1 Reconstruction of the urinary tract at the appropriate time reduces fibrosis of the  
2 metanephros in rats as judged by imaging

3

4 Short Title: Establishment of appropriate time for urinary tract reconstruction in fetal  
5 metanephros by imaging

6

7 Kotaro Nishi<sup>1</sup>, Takafumi Haji<sup>1</sup>, Takuya Matsumoto<sup>1</sup>, Chisato Hayakawa<sup>1</sup>, Kenichi  
8 Maeda<sup>1</sup>, Shozo Okano<sup>1</sup>, Takashi Yokoo<sup>2,3</sup>, Satomi Iwai<sup>1,3\*</sup>

9

10 <sup>1</sup>Laboratory of Small Animal Surgery 2, School of Veterinary Medicine, Kitasato  
11 University, Towada, Aomori, Japan

12 <sup>2</sup>Division of Nephrology and Hypertension, Department of Internal Medicine, The Jikei  
13 University School of Medicine, Minato-ku, Tokyo, Japan

14 <sup>3</sup>Meiji University International Institute for Bio-Resource Research, Kawasaki,  
15 Kanagawa, Japan

16

17 \* Corresponding author

18 E-mail: [iwai@vmas.kitasato-u.ac.jp](mailto:iwai@vmas.kitasato-u.ac.jp) (SI)

19

20

## 21 **Abstract**

22           Chronic kidney disease leads to high morbidity rates among humans. It is a  
23 serious disease that requires curative treatments other than kidney transplantation.  
24 Recently, we successfully established the iPS-derived generated kidney, which might  
25 produce urine. The urine can be directed to the native bladder with a stepwise peristaltic  
26 ureter system, followed by anastomosis with the recipient ureter for reconstruction of  
27 the urinary tract. However, the growth of the regenerated kidney varies significantly,  
28 whereas the time window of the anastomosis is quite narrow. Therefore, this study was  
29 conducted to evaluate the growth of transplanted metanephros with bladder periodically  
30 and noninvasively using computed tomography and ultrasonography. Ultrasonographic  
31 findings showed high correlations with computed tomographic findings and clearly  
32 evaluated metanephros with bladder. We found that the degree of growth of the  
33 metanephros with bladder after the transplantation differed in each individual. However,  
34 most of them reached the appropriate period for urinary tract reconstruction within 3  
35 weeks after transplantation. Optimizing the stepwise peristaltic ureter system  
36 anastomosis by ultrasonography reduced long-term tubular dilation of the metanephros,  
37 thereby decreasing fibrosis caused by transforming growth factor- $\beta$ . This may be  
38 significantly related to long-term maturation of fetal grafts. These results provide new

39 insights into transplanting regenerated kidneys in higher animals. We are one step closer  
40 to the first human trial of kidney generation.

41

## 42 **Introduction**

43 The morbidity rate of end-stage renal disease (ESRD) remains high. Although  
44 kidney transplantation is the main curative treatment, securing an available donor is  
45 difficult [1]. Apart from the number of people waiting for a kidney transplant, the  
46 number of patients undergoing hemodialysis is increasing. There is a large number of  
47 ESRD patients worldwide; furthermore, all these associated factors cause huge medical  
48 expenses and impose heavy burden on families in particular and the society in general  
49 [2].

50 There is a need treatment for alternatives to kidney transplantation and dialysis,  
51 which must be a fundamental treatment. There has been an attempt to make a kidney  
52 from pluripotent stem cells de novo. Takasako et al. [3,4] examined a method for  
53 producing renal organoids in vitro by aggregating nephron progenitor cells and ureteric  
54 bud. Organoids include differentiating nephrons, interstitial, and vasculature, which  
55 have matured in a culture. In addition, the use of human stem cells has made it possible

56 to produce organoids that resemble human fetal kidneys. However, the size of organoids  
57 was smaller than 2 mm, and could not gain enough ability for the production of urine,  
58 such as functional maturation of tubules, glomerular neovascularization, and urinary  
59 excretion pathway.

60 To overcome these issues, we made an attempt to generate a kidney from induced  
61 pluripotent stem cells (iPS cells) using nephrogenic niche of xeno-animal as the scaffold  
62 to generate the kidney [5,6]. In this system, iPS cell-derived nephron progenitor was  
63 injected into the nephrogenic zone of xeno-embryo and cultured in the nephrogenic  
64 environment. We confirmed that injected cells continued to develop further to form a  
65 nephron, and it started producing urine following transplantation in vivo [7]. By  
66 eliminating the native nephron progenitor cells (NPCs) in the nephrogenic zone during  
67 development using genetic manipulation, pure nephron from external NPCs can be  
68 successfully generated [8]. We also confirmed that this system can generate interspecies  
69 chimeric nephron between rats and mice [9], and also iPS cells from hemodialysis  
70 patients can be used without deterioration compared with those from healthy controls  
71 (Tajiri Sci Rep). Based on this success, we are currently conducting the scale up  
72 experiment using bigger animals to proof the efficacy and safety for human clinical use.  
73 However, one big hurdle remains for the next stage. Transplantation alone does not

74 provide a route for excretion of the produced urine. Thus, metanephros can cause  
75 hydronephrosis and renal insufficiency [11,12]. This may be solved using Stepwise  
76 Peristaltic Ureter (SWPU), which (S1 Fig.) comprises anastomosis of the ureters of the  
77 recipient rats to the bladder using a developed metanephros with bladder (MNB) [11].  
78 This new method made it possible to continuously excrete urine produced from the  
79 MNB to the recipient bladder via the recipient ureter [11]. However, the timing of  
80 anastomosis with the ureter of the recipient after transplantation is crucial and owing to  
81 individual differences in the growth of MNB, hydronephrosis may occur at ambiguous  
82 anastomosis times [11,13]. Postrenal nephropathy due to hydronephrosis imposes a  
83 heavy burden on the kidneys, and the delayed release of obstruction has substantial  
84 effects on the kidneys [14-16]. Ureteral primordia obstruction during the fetal stage has  
85 been shown to cause dysplastic metanephros [17]. Therefore, we believe that early  
86 released obstruction is significantly involved in subsequent renal functions, even with  
87 fetal-derived grafts. In the case of xenotransplantation and MNB transplantation in large  
88 experimental animals, the effects of individual differences are considered to be greater.  
89 Appropriate time must be allowed for urinary tract reconstruction using a minimally  
90 invasive method that can be used to observe MNB over time and can be clinically  
91 performed. Clinical and general imaging methods, including contrast-enhanced

92 computed tomography (CT) and particularly, ultrasonography have been used because  
93 they help to easily determine the condition of the body and are less invasive.

94 Therefore, in this study, we aimed to establish the appropriate time index for  
95 urinary tract reconstruction using morphological and histopathological examination and  
96 image analysis.

97

## 98 **Materials and methods**

99 Experiment 1 was a morphological assessment of two transplanted MNBs using  
100 contrast CT and ultrasonography examinations. Experiment 2 investigated the  
101 hypothetical conditions for appropriate timing of urinary tract reconstruction based on  
102 the results of Experiment 1 when the following two conditions were met:

- 103 1. Neither hydronephrosis of the MNB metanephros, nor two or more vacuoles were  
104 observed in MNB by ultrasonography.
- 105 2. MNB bladder was larger than  $0.016 \text{ cm}^3$ , when assessed by ultrasonography.

106 In Experiment 3, anastomosis was performed and the MNB grew up to 8 weeks after  
107 transplantation; then, glomerular filtration rate (GFR) measurements and  
108 histopathological examinations were performed.

109

## 110 **Animals**

111           The animal rearing management was carried out according to the Kitasato  
112 University Faculty of Veterinary Medicine Animal Experiment Guideline and Manual  
113 for Rearing and Management of Experimental Animals (Approval No: 17-127, 18-127,  
114 19-085). The rats were housed in cages under temperature and light-controlled  
115 conditions in a 12-hour cycle and were provided with fresh food and water *ad libitum*.

116           In Experiment 1, we used three pregnant female Lewis rats on gestation day 15  
117 (E15) (Japan Charles River Laboratories, Kanagawa, Japan) to obtain fetal MNB. As  
118 recipient rats (organ recipient animals), we used 12 male Lewis rats (Japan Charles  
119 River Laboratories) aged 11 weeks, with a body weight of  $309.0 \pm 11.4$  g.

120           In Experiment 2, we used three pregnant female Lewis rats on E15 (Japan Charles  
121 River Laboratories), and as recipient rats, 18 male Lewis rats (Japan Charles River  
122 Laboratories) aged 9 weeks, with a body weight of  $243.0 \pm 7.5$  g.

123           In Experiment 3, we used three pregnant female Lewis rats on E15 (Japan Charles  
124 River Laboratories), and as recipient rats, 9 male Lewis rats (Japan Charles River  
125 Laboratories), aged 10 weeks, with a body weight of  $292.8 \pm 7.6$  g.

126



## 127 **Isolation and grafting of MNB**

128 The surgery was performed by an experienced surgeon specialized in  
129 microsurgery. Pregnant rats were anesthetized by 2.5% isoflurane inhalation. Embryos  
130 (E15) were harvested, and the pregnant rats were then killed immediately by an infusion  
131 of pentobarbital (120 mg/kg). All the embryos were euthanized by decapitation. The  
132 MNBs were dissected under a surgical microscope, as previously described [11].

133

## 134 **Method of MNB transplantation/urinary tract reconstruction**

### 135 **Experiment 1: Usefulness of CT examination and ultrasonography,** 136 **and image evaluation of MNB**

137 The flow of the experiment is shown in Fig. S2 A. Anesthesia was introduced and  
138 maintained in the recipient rats using 2.5% isoflurane. After performing a laparotomy  
139 through a midline abdominal incision, the intestinal tract was pulled out of the body,  
140 and the retroperitoneum and the abdominal aorta were exposed. A small incision was  
141 made to the retroperitoneum under a surgical microscope, and the first MNB (MNB1)  
142 was transplanted to the retroperitoneal space near the abdominal aorta. After  
143 transplantation, a single interrupted suture was made on the retroperitoneum using 6-0  
144 non-absorbable suture thread (PROLENE®, Johnson and Johnson K.K., Tokyo, Japan).

145 The wound was closed using conventional methods. The animals were divided into two  
146 groups. The first group comprised randomly selected rats that had the left recipient  
147 kidney removed 4 weeks after MNB1 transplantation and underwent urinary tract  
148 reconstruction by anastomosing the recipient ureter to the MNB (n = 5: anastomosis  
149 group). The second group consisted of randomly selected rats that did not undergo  
150 urinary tract reconstruction by anastomoses (n = 7: non-anastomosis group). In addition,  
151 both groups had the second MNB (MNB2) transplanted in week 4. We distinguished  
152 MNB2 from MNB1 by transplanting MNB2 to the head side of MNB1. Eight weeks  
153 after MNB1 transplantation, both MNB1 and MNB2 were removed, and  
154 histopathological examinations were conducted.

155

## 156 **Experiment 2: Establishment of an appropriate anastomosis time for** 157 **each MNB**

158 The flow of the experiment is shown in Fig. S2 B. Only a single MNB  
159 transplantation was performed, with the same methods as in Experiment 1. MNB  
160 observations were performed every other day from 2.5 weeks after transplantation, and  
161 the morphological characteristics and MNB volume were assessed in the same  
162 technique as in Experiment 1. If MNBs met the conditions of appropriate timing for

163 urinary tract reconstruction, as established in Experiment 1, the animals were  
164 euthanized and the MNB was removed. Animals that did not meet the conditions were  
165 observed until Week 5, before having the MNB removed. The removed MNB was fixed  
166 for histopathological examinations.

167

168 **Experiment 3: MNB evaluation after SWPU at the appropriate time**  
169 **for anastomosis**

170 The flow of the experiment is shown in Fig. S2 C. Only a single MNB  
171 transplantation was performed, under the same methods as in Experiment 2. MNB  
172 observations were performed every other day from 2 weeks after transplantation, and  
173 the morphological characteristics and MNB volume were assessed with the same  
174 technique as in Experiment 1. Six animals were randomly selected and if MNBs met the  
175 conditions of appropriate timing for urinary tract reconstruction, as established in  
176 Experiment 1, they underwent SWPU (n = 6: SP group). The remaining three randomly  
177 selected animals underwent SWPU at 4 weeks and were observed for 8 weeks after the  
178 transplantation (n = 3: 28UR group). After measuring the GFR, the MNBs of rats were  
179 removed and fixed for histopathological examinations. The rats were euthanized after  
180 removal of the MNBs.

181

## 182 **MNB assessment using contrast CT scans**

183 For the imaging, we used the Ailion 16 Multi slice CT system (Toshiba Medical  
184 Systems K.K., Tochigi, Japan). The experiments were conducted in dynamic CT mode,  
185 at a tube voltage of 80 kV, tube current of 150 mA, imaging rotation speed of 0.5  
186 sec/rotation, and slice thickness of 0.5 mm. The radiation exposure dose was kept  
187 unified at 392.7 mGy. The animals were anesthetized and maintained with 2.5%  
188 isoflurane at 2.5 weeks and 3.5 weeks after MNB2 transplantation (6.5 and 7.5 weeks  
189 after MNB1 transplantation, respectively), and they were all kept in the supine position  
190 during imaging.

191 For contrast CT examinations, the animals received a bolus injection of 0.3  
192 mL/head Iohexol (Omnipaque® 300 injection, Daiichi Sankyo K.K., Tokyo, Japan), an  
193 iodine contrast agent, into the tail vein and images were taken 30 min later, when the  
194 contrast agent was thought to have accumulated in the MNB.

195 After reconstitution and reconstruction of the images, we processed them using  
196 the DICOM viewer software OsiriX, to assess the morphological characteristics and  
197 MNB volume.

198

## 199 **MNB assessment using ultrasonography**

200 Three technicians, who use the ultrasonography device on a daily basis,  
201 performed the examination to randomly selected rats. To carry out these tests, the rats  
202 were anesthetized and maintained until the end of the procedure using 2.5% isoflurane.  
203 Their abdomens were shaved, and the animals were kept in the supine position. The  
204 ultrasound device LOGIQ S8 (GE Healthcare Japan K.K., Tokyo, Japan) was used.  
205 After identifying the MNB through the observation of axial, sagittal, and coronal cross-  
206 sections, the maximum long-axis length of the sagittal cross-section (L), maximum  
207 short-axis width of the axial cross-section (W), and height of maximum depth (H) were  
208 measured. The volume ( $V$ ) of the MNB bladder was also assessed.  
209 As a probe, we used a 3-11 MHz linear array. We used the color Doppler mode to  
210 identify the presence/absence of blood flow to the transplanted MNB. To measure the  
211 MNB or MNB bladder volume, we used B mode and set the gain and depth to 90 and  
212 2.3–2.5 cm, respectively, and then we observed the morphology and measured the size.  
213 Volume calculation by ultrasonography assumed the MNB to be a spheroid, substituting  
214 the values into the formula shown below for the volume of a spheroid:

$$215 \quad V = \frac{\pi}{6} \times L \times W \times H$$

216

## 217 **Removal of the transplanted MNB**

218           After anesthetizing the rats with 2.5% isoflurane, we made a midline abdominal  
219 incision and removed the MNB, which was used for histopathological examinations.  
220 After we intraperitoneally administered 125 mg/kg of pentobarbital and confirmed the  
221 cardiopulmonary arrest 15 min later.

222

## 223 **Histopathological examination**

224           The MNB tissues were fixed using 4% paraformaldehyde phosphate buffer  
225 solution and were embedded in paraffin as previously described [11]. Hematoxylin-  
226 eosin (HE) dye and Masson's trichrome staining (MT) were used in Experiments 1 and  
227 2. In Experiment 3, the tissues were thinly sliced to 2  $\mu$ m and stained for TGF- $\beta$  1 (sc-  
228 130348: Santa Cruz, CA), collagen- $\alpha$ 1 type 1 (sc-293182: Santa Cruz, CA), vimentin  
229 (422101: Nichirei Biosciences Inc., Tokyo, Japan) and cell apoptosis for  
230 immunostaining. TUNEL assay was performed to detect apoptotic cell death using the  
231 in situ Apoptosis Detection Kit (Takara Bio Inc., Shiga, Japan) according to the  
232 manufacturer's instructions. The entire metanephros cut at maximum length were  
233 observed at 400 $\times$  magnification, HE, MT, TGF- $\beta$  1, collagen- $\alpha$ 1 type 1, vimentin with  
234 20 taken, TUNEL with ten images taken for each slide. The images were assessed by

235 researchers, who were blinded, using the image analysis software ImageJ® (National  
236 Institutes of Health, Bethesda, Maryland, USA); HE-stained slides were used to  
237 evaluate tubular lumen area and MT dyed slides to evaluate interstitial fibrosis in the  
238 metanephros.

239

## 240 **GFR measurement**

241 GFR was measured using a commercially available kit (Diacolor® Inulin,  
242 TOYOBO CO., LTD., Osaka, Japan). The measurement was performed according to the  
243 kit method. Eight weeks after transplantation in Experiment 3, bilateral nephrectomy  
244 was performed under the same anesthesia as mentioned previously. The blood was  
245 collected from the tail vein of the rats at one and two hours after inulin administration,  
246 and the measurement was carried out using the plasma. Normal kidney GFR values  
247 were determined by measuring healthy adult rats (Table S).

248

## 249 **Statistical Analyses**

250 The results are presented as mean  $\pm$  standard deviation. All statistical analyses  
251 were performed with EZR (Saitama Medical Center, Jichi Medical University, Saitama,  
252 Japan) [18]. More precisely, it is a modified version of R commander, designed to add

253 statistical functions frequently used in biostatistics. Scatter plot and Pearson's product  
254 ratio correlation coefficient were applied for volume comparison and storage volume  
255 comparison using ultrasonography and contrast CT examination, and the relationship  
256 between TGF- $\beta$ 1 expression levels and the percentage of apoptotic cells. We used the  
257 paired student's t-test to examine the differences in volume observed over time by  
258 ultrasonography. The Mann–Whitney U test was used to analyze tubular dilation, and  
259 metanephros fibrosis was examined through histopathological examinations. A *p*-value  
260 of 0.05 was set as statistically significant.

261

## 262 **Results**

### 263 **Experiment 1**

#### 264 **MNB detection rate by contrast CT and ultrasonography examinations**

265 Contrast CT and ultrasonography examinations allowed us to evaluate all MNBs  
266 by Week 3 (Fig. 1). However, it was not possible to assess the MNB bladder and MNB  
267 that underwent hydronephrosis. Ultrasonographic examinations allowed us to detect  
268 MNB that was present near the aorta from the early stage, and the margins were clear  
269 too. Furthermore, it allowed 100% recognition of both MNB1 and MNB2, from Week 3  
270 onward after transplantation (Fig. 2) and partial observation of the newly formed blood



271 vessels around the MNB by the color Doppler method (Fig. 1 D). Additionally, it was  
272 possible to confirm the metanephros (Figs 1B and C).

273

274 **Fig. 1. Computed tomography (CT) and ultrasonography images in Experiment 1.**

275 A) Visualization of MNB on the abdominal arteriovenous vein under the retroperitoneal

276 area by contrast-enhanced CT. B) Ultrasonographic images of MNB considered to be

277 maturing normally as urine retention was observed in the MNB bladder. C)

278 Ultrasonography image of suspected hydronephrosis of the MNB. D) The blood flow

279 around the MNB could be confirmed by color Doppler using an ultrasound. ※red

280 arrow: MNB1, yellow arrow: MNB2, red circle: MNB, blue arrow: bladder of MNB,

281 arrow head: metanephros of MNB, UB: Recipient's bladder

282

283 **Fig. 2. MNB volume transition during observation by contrast-enhanced CT and**

284 **ultrasonography examinations in Experiment 1.**

285 The figure shows the volumes of MNB by CT and ultrasound. The volume of CT was

286 measured at 6.5 and 7.5 weeks and that of ultrasonography was performed weekly until

287 8 weeks after transplantation of MNB1.

288 \* $p < 0.01$  vs. ultrasound, †  $p < 0.01$  vs. the week after.

289 MNB: metanephros with bladder, CT: computed tomography, Week: weeks after

290 transplantation of MNB1.

291

292 **Table 1. MNB detection rate by ultrasonography from weeks 1–4 after**

293 **transplantation in Experiment 1.**

|       | Detection rate of MNB |        |        |        |
|-------|-----------------------|--------|--------|--------|
|       | Week 1                | Week 2 | Week 3 | Week 4 |
| MNB 1 | 16.7%                 | 83.3%  | 100%   | 100%   |
| MNB 2 | 75%                   | 91.7%  | 100%   | 100%   |

294 MNB1: the first transplanted MNBs in week 0, MNB2: the second transplanted MNBs

295 in week 4. The detection rates during observation by ultrasound after transplantation in

296 each of MNB1 and MNB2 are shown in the table.

297

298 **Correlation of volume assessment with urine volume retained in MNB1**

299 **and MNB bladder volume assessment**

300 The comparison of volumes measured by contrast CT and ultrasonography  
301 examinations (Week 2.5: MNB1,  $R = 0.78$ ; MNB2,  $R = 0.79$  and Week 3.5: MNB1,  $R =$   
302  $0.90$ ; MNB2 =  $0.94$ ) indicated a strong positive correlation between MNB1 and MNB2  
303 (Fig. 3). Furthermore, the amount of urine collected from the MNB1 showed a strong  
304 positive correlation with the MNB volume determined by ultrasonography ( $R = 0.89$ ).

305

306 **Fig. 3. Correlation of the volume between ultrasonography and contrast computed**  
307 **tomography inspection at each week in Experiment 1.**

308 The dotted line is the MNB1 and the solid line is the MNB2. A) 6.5 weeks after MNB  
309 transplantation (MNB1,  $R = 0.78$ ; MNB2,  $R = 0.79$ ). B) 7.5 weeks after MNB  
310 transplantation (MNB1,  $R = 0.90$ ; MNB2,  $R = 0.94$ ).

311

312 **Tubular dilation and fibrosis in MNB1 and MNB2 by histopathological**  
313 **examinations**

314 Tubular dilation was significantly larger in the non-anastomotic than in the  
315 anastomotic group ( $p < 0.05$ ). For MNB2, no significant difference was observed  
316 regardless of the anastomosis or non-anastomosis of MNB1. However, tubular  
317 dilatation was observed in all MNB2. Additionally, there was no significant difference

318 in fibrosis between MNB1 and MNB2, irrespective of anastomosis or non-anastomosis.

319 This indicates that MNB2 shows the same level of growth and induces fibrosis

320 regardless of the degree of renal impairment due to tubular dilation of MNB1.

321

## 322 **Experiment 2**

### 323 **Number of days from MNB transplantation to MNB removal**

324 Results are shown in Fig 4. All MNBs could be confirmed by Week 2.5. MNBs

325 with no bladder formation or with hydronephrosis were deemed poorly developed

326 (3/18). The number of days for MNB removal, aside the poorly developed ones, were

327  $20.7 \pm 3.6$  days (17 to 29 days). For the 72.2% (13/15) of the excised MNB, it was

328 deemed appropriate for urinary tract reconstruction to be performed within 3 weeks

329 after transplantation. For the 20% (3/15), 26.7% (4/15), 40% (6/15), and 13.3% (2/15),

330 17 days, 19 days, 21 days, and 28 days or more were deemed appropriate timing for

331 reconstruction, respectively.

332

333 **Fig. 4. The number of days until the urinary tract reconstruction age and number**

334 **of MNBs excised after transplantation in Experiment 2.**

335 The table shows the number of MNBs excised at a time considered to be an appropriate  
336 time for anastomosis. Most of MNBs were removed within 3 weeks after  
337 transplantation.

338

339 **Number of days to MNB removal and progression in rate of tubular**  
340 **dilation and fibrosis**

341 The MNBs removed 21 or more days after transplantation had significantly  
342 milder tubular dilation than those removed less than 21 days after transplantation ( $p$   
343  $<0.01$ ) (Fig. 5 A). There was no difference in fibrosis in MNB removed 21 days prior  
344 and 21 days after transplantation. (Fig. 5 B).

345

346 **Fig. 5. Comparison of tubular dilation and interstitial fibrosis in MNB removed 21**  
347 **days prior and 21 days after transplantation.**

348 A) Tubular dilation, B) Tubulointerstitial fibrosis. The degree of tubular dilation 21  
349 days prior to transplantation decreased significantly compared with that of 21 days after  
350 transplantation. \*  $p < 0.01$

351

## 352 **Experiment 3**

### 353 **GFR value of MNB 8 weeks after transplantation**

354 Table 2 shows the GFR measurement results. GFR could be measured in all the  
355 animals in the SP and 28UR groups. Although no significant difference was observed  
356 between the 28UR and the SP groups, none of the animals in the SP group had a GFR of  
357 0%.

358

359 **Table 2. Comparison of GFR values and normal values of MNB**

|                                    | <b>SP group</b> | <b>28UR group</b> |
|------------------------------------|-----------------|-------------------|
| <b>GFR (ml/min/m<sup>2</sup>)</b>  | 1.95 ± 1.04     | 1.23 ± 1.22       |
| <b>Compared to Normal rats (%)</b> | 1.1 ~ 5.7%      | 0 ~ 5.1%          |

360

361 **Tubular dilatation and interstitial fibrosis in MNB of experiment 3 in**

362 **histopathological examinations**

363 An image of the extracted MNB is shown as an example (Fig. 6 A). In the SP  
364 group, the color of the surface of the metanephros could be visually confirmed to have  
365 blood flow, and the SP group grew without hydronephrosis. As shown in Fig. 6 B, in  
366 the 28UR group, the observed shape of metanephros was irregular. In some cases, the  
367 metanephros was hydronephrotic without liquid storage in the MNB bladder. Fig. 7  
368 shows a micrograph of HE staining for the evaluation of tubular dilatation. The 28UR  
369 group tended to expand compared to the SP group, but no significant difference was  
370 observed between the two groups (Fig. 7 C).

371

372 **Fig. 6. Example of extracted MNB in Experiment 3**

373 The red arrows indicate the metanephros and the yellow arrows indicate the bladder.  
374 Fig. 6-A shows that the metanephros did not expand and the MNB is considered to have  
375 grown steadily. By contrast, the MNB in the Fig. 6-B has an irregular shape with severe  
376 metanephros hydronephrosis.

377

378 **Fig 7. Histopathological examination images of tubular in Experiment 3.**

379 A) MNB which was judged to be a suitable period of SWPU method by  
380 ultrasonography. B) Histopathology of metanephros with hydronephrosis confirmed by

381 ultrasonography at 4 weeks. C) Comparison of tubular expansion area between the SP  
382 and 28UR groups.

383

384 MT staining for the evaluation of interstitial fibrosis is shown in Figs. 8 A and B.

385 A comparison of interstitial fibrosis is shown in Fig. 8 C. Interstitial fibrosis was  
386 significantly less in the SP than in the 28UR group ( $p < 0.01$ ). These results indicated  
387 that fibrosis was progressing from the initial stage of tubular dilation.

388

389 **Fig. 8. Interstitial fibrosis in MNB in Experiment 3**

390 A) MNB which was judged to be a suitable period of SWPU method by  
391 ultrasonography. B) Histopathology of the metanephros with hydronephrosis confirmed  
392 by ultrasonography at week 4. C) Comparison of interstitial fibrosis area between the  
393 SP and 28UR groups.

394

395 The measurements of fibrosis marker are shown in Fig. 9. TGF- $\beta$ 1 was strongly  
396 expressed in the 28UR group; mainly in the tubular cells, interstitial, and glomeruli, and  
397 similarly, vimentin and type I collagen- $\alpha$ 1 showed significant expression in the tubular



398 interstitial. The SP group was significantly milder in all evaluations than the 28UR  
399 group ( $p < 0.01$ ) (Fig. 9 G).

400

401 **Fig. 9. Expression of TGF- $\beta$ , collagen and vimentin in Experiment 3**

402 A, D) stained image of TGF- $\beta$  1. B, E) stained image of Type I collagen- $\alpha$  1. C, F)  
403 stained image of Vimentin. G) All of these assays in the SP group were significantly  
404 lower than those of the 28UR group ( $p < 0.01$ ).

405

406 The image of TUNEL staining and the comparison of the ratio of apoptotic cells  
407 in the tubular and glomerular cells are shown in Fig. 10 A. The percentage of apoptotic  
408 cells was significantly lower in the SP group than in the 28UR group ( $p < 0.05$ ) (Fig. 10  
409 B). Furthermore, there was a strong positive correlation between TGF- $\beta$ 1 expression  
410 and the percentage of apoptotic cells in both the glomerular and tubular cells ( $p < 0.01$ )  
411 (Figs. 10 C and D).

412

413 **Fig. 10. Detection of apoptosis by fluorescent staining, and correlation between**  
414 **expression of TGF $\beta$ -1 and apoptosis positive rate**

415 A) Image of TUNEL staining in SP group; Yellow arrows indicate apoptotic cells. B)  
416 Image of TUNEL staining in 28UR group; this confirmed a number of apoptotic cells in  
417 tubular cells. C) Correlation between apoptosis rate and TGF- $\beta$ 1 expression region in  
418 glomerular cells, D) Correlation between apoptosis rate and TGF- $\beta$ 1 expression region  
419 in tubular cells

420

## 421 **Discussion**

422           Currently, urinary tract reconstruction or extraction is performed in the  
423 transplanted MNB and metanephros approximately 3 to 6 weeks after transplantation,  
424 depending on the animal species and the transplantation site [11,19-21]. Metanephros  
425 weight gain stops at about 4 weeks after the transplantation [2], and it has been reported  
426 that after development, the GFR is about 3%–11% of that of normal kidneys, as the  
427 metanephros alone is a small tissue [21,22]. However, the survival time did not differ  
428 from the cases in which one MNB was transplanted, even in experiments in which  
429 several MNBs were transplanted [13]. One of the factors is that the metanephros has a  
430 remarkable degree of hydronephrosis and fibrosis. Obstruction during the development  
431 of rat kidneys has been reported to cause developmental suppression and persistent  
432 damage after maturation [14,15]. For this reason, it was necessary to investigate the

433 appropriate timing for SWPU. Therefore, as in previous papers, two MNBs were  
434 transplanted, and their development was closely observed by ultrasonography and CT.

435 Contrast-enhanced CT showed no enhancement of the metanephros and bladder  
436 of MNB; however, it was possible to evaluate the MNB to the extent that the MNB  
437 volume was measured, and this was regarded as an accurate volume index. A single  
438 intravenous dose of iohexol, the nonionic iodine-based contrast agent, undergoes rapid  
439 clearance from the blood of rats and translocates to the tissues [23]. It rapidly migrates  
440 to the kidneys and is distributed at high concentrations [23]. Yokote et al. [11]  
441 previously performed contrast-enhanced CT on MNB to confirm urinary patency after  
442 SWPU in MNB. In that study, both kidneys were removed, and the anastomotic ureter  
443 was ligated; angiography was performed to visualize the recipient ureter [11]. In this  
444 present study, we considered that one of the recipient's kidneys was present, resulting in  
445 the excretion of the contrast agent before it flowed into the MNB.

446 Ultrasonography detected MNB in all animals, similar to contrast-enhanced CT  
447 examinations. Ultrasonography assessed MNB morphologically, unlike contrast-  
448 enhanced CT. As the MNB was transplanted into the retroperitoneum, it was possible to  
449 be identified at an earlier stage than expected by specifying the expansion of the  
450 retroperitoneal cavity. We also observed blood flow to the MNB using ultrasonography

451 and observed the neovascularized vessels. Urine production has been previously  
452 confirmed by metanephros transplantation or MNB transplantation [11,12,24].  
453 Therefore, as we hypothesized, the MNB bladder was visualized using low echo,  
454 making retrieval easier. In children with congenital hydronephrosis, ultrasonography  
455 can reveal septum and cyst in the kidneys when severe hydronephrosis occurs [25,26].  
456 Here, it was also possible to evaluate hydronephrotic metanephros without a urinary  
457 excretion pathway, because the parenchyma was visualized as a vacuole with an  
458 indistinct parenchyma, like severe hydronephrosis in a developed kidney. Spheroid  
459 volume measurements by ultrasonography was also used in the kidney, thyroid, and  
460 prostate [27,28-31]. As the MNB volume determined by ultrasonography in this study  
461 strongly correlated with that of the CT, and the MNB was approximated despite the  
462 very small volume, volume calculation using the spheroid equation was also considered  
463 very accurate for MNB. Therefore, ultrasonography is considered to be a simple,  
464 minimally invasive, and useful method, considering the effects on the contrast medium  
465 and radiation as in contrast-enhanced CT examinations.

466 In Experiment 1, there was no difference in tubule dilation and fibrosis in MNB2  
467 compared with MNB1, regardless of the presence or absence of SWPU in MNB1. This  
468 suggests that, by 4 weeks after transplantation, many metanephros had already

469 experienced hydronephrosis, and the appropriate timing had passed with or without  
470 urinary tract reconstruction. Indeed, previous reports referred to the presence of MNBs  
471 that had experienced hydronephrosis by 3 weeks after transplantation [11]. A  
472 comparison of the growth rates between MNB1 and MNB2 showed no significant  
473 difference in the MNB volumes, but rather showed that the detection rate by  
474 ultrasonography was higher in the first week of MNB2. A plurality of blood vessels  
475 around the MNB1 and MNB2 were confirmed using a color Doppler method for the  
476 first 2 weeks after transplantation. It has been confirmed that the transplanted  
477 metanephros regenerates recipient-derived blood vessels and is chimerized with the  
478 donor's metanephros [32]. Angiogenesis involves factors such as vascular endothelial  
479 growth factor, platelet-derived growth factor, and fibroblast growth factor [33]. These  
480 angiogenic factors play important roles in tissue ischemia and angiogenesis. One report  
481 suggests that the metanephros is provided with a spatial direction for capillary  
482 development by VEGF [34] and may be involved in the vasculature identified around  
483 the MNB. However, it must be considered that VEGF is also involved in fibrosis, which  
484 promotes the growth of grafts and may further exacerbate fibrosis during  
485 hydronephrosis [35,36]. In the unilateral ureteric obstruction (UUO) model of  
486 progressive injury, an angiogenic response was observed early and the endothelial cells

487 proliferated; however, this led to endothelial cell loss after the 4<sup>th</sup> day [37]. Therefore,  
488 the neovascularized capillaries disappeared, and the tissue fell into an ischemic state  
489 again. The high detection rate of the MNB2 and the presence of tubular dilation at 4  
490 weeks after transplantation suggest that the neovascularization of the MNB1 may also  
491 affect MNB2. The MNB2 could be affected by MNB1 angiogenesis because it was  
492 implanted just above the MNB1 in the retroperitoneal cavity. One of the reasons may be  
493 that one kidney was removed during the MNB2 transplantation. Studies in fetal ewes  
494 have shown that in the event of a sudden loss of unilateral renal function due to  
495 obstruction in the unilateral ureter, the remaining kidney plays a compensatory role,  
496 resulting in kidney enlargement [38]. Moreover, a growth period of 4 weeks may be  
497 sufficient to develop into hydronephrotic metanephros of MNB2. This suggests that the  
498 degree of growth was not constant when multiple grafts were transplanted and may vary  
499 greatly between MNBs.

500 In Experiment 2, only one MNB was transplanted, and the MNB growth rate and  
501 appearance of MNB bladder were observed over time in more details to establish an  
502 index of the appropriate timing of SWPU. Even when only one MNB was transplanted,  
503 the growth rate varied among individuals as can be inferred from the results.  
504 Particularly well-developed MNB showed bladder dilation within the 3 weeks after

505 transplantation with a percentage of 38.9% of the total. By week 3 after transplantation,  
506 more than half of the MNB had the appropriate timing for urinary tract reconstruction,  
507 suggesting that SWPU should be done earlier than previously reported. Furthermore,  
508 there was a poorly developed MNB without appearance or change in size of the MNB,  
509 bladder from the third week onward. Histopathological examination did not show  
510 excessive tubular dilation and progression of fibrosis as observed in Experiment 1 in  
511 MNB resected at the appropriate stage of urinary tract reconstruction. Obstruction  
512 causes increased ureteral/pelvic pressure and tubular dilatation in the kidney. This  
513 increase in pressure stimulates tubular epithelial cells and causes fibrosis to progress  
514 due to epithelial-mesenchymal transition [39]. Previous studies, using the rat UUO  
515 model, showed the expression of TGF- $\beta$ 1 immediately after the obstruction of the  
516 urinary tract and the expression of vimentin and myofibroblasts 2 days after the  
517 obstruction [37]. The same is true for the experiment conducted in the organogenesis  
518 stage using the rat neonatal UUO model, and the growth rate decreased by 30% even  
519 after unblocking 5 days after obstruction, while all of blood pressure, GFR, urine flow,  
520 and sodium/potassium excretion decreased [15]. Therefore, it has been shown that UUO  
521 is particularly susceptible to long-term effects immediately after kidney formation  
522 [14,15]. Although the transplanted MNB cannot be completely explained by the

523 neonatal UUO model, considering the period after transplantation as being in the  
524 neonatal period, it can be expected that the occlusion period is similarly involved in the  
525 growth of the transplanted metanephros. Here, ultrasonographic observations were  
526 performed every other day; some animals showed rapid bladder dilation even on this  
527 day. Rats have only 10% of the nephron formed at birth, and it is said that kidney  
528 formation is completed within the first week after birth [15]. The fetus used this time  
529 was 15 days of fetal age, and the birth of the rat is usually 21 to 23 days of fetal age on  
530 average; therefore, considering that the morphological formation of the kidney is  
531 completed 2 weeks after transplantation, a rapid development of urine in the MNB  
532 bladder, 2 to 3 weeks after transplantation is considered as normal development. It can  
533 be said that, even in the case of MNB, those that grew well may grow at the same  
534 growth rate as the organs in the fetal rat body that grew normally. For this reason, it is  
535 important to observe and evaluate MNB bladder dilation daily from the second week  
536 when MNB grows rapidly. GFR measurement had been performed, when the  
537 metanephros was transplanted, and showed a low value of 3% to 11% of normal.  
538 Although not the same measurement method, the value of 5% of normal in the SP group  
539 in this study was within the range we assumed. This is because, in previous reports, the  
540 metanephros grew about 90 to 116 days after reconstructing the urinary tract [24], and it



541 is thought that a certain amount of tissue was present. Urinary tract reconstruction for  
542 these metanephros was performed mainly at a time determined by naked eye and may  
543 have been exposed to long-term obstruction. Prolonged obstruction results in the  
544 persistent dilation of the tubule, the glomerular Bowman's capsule, and the production  
545 of inflammatory cytokines such as TGF- $\beta$  from the tubular cells [40]. TGF- $\beta$ 1 is  
546 expressed in tissues such as the hematopoietic tissue, endothelial tissue, and bone tissue  
547 in developing embryos, and acts as an important growth factor as in heart formation  
548 [41,42]. However, TGF- $\beta$ 1 is also deeply involved in fibrosis, causing epithelial to  
549 mesenchymal transition (EMT) in tubular cells in the kidney and inducing expression of  
550 vimentin, collagen, and alpha-smooth muscle actin [40]. In addition, TGF- $\beta$ 1 targets  
551 protease inhibitor-1 (PAI-1) in proximal tubular epithelial cells and stromal fibroblasts,  
552 and the transcription factor p53 replicates through this PAI-1. It causes an aging state  
553 and induces cell growth inhibition and apoptosis [40,43-45]. TGF- $\beta$ 1 expression has  
554 also been reported in the metanephros in fetuses and our defined urinary tract  
555 reconstruction at the appropriate anastomosis stage in MNB inhibited TGF- $\beta$ 1  
556 expression due to persistent inhibition of tubular dilatation. It is presumed that the  
557 replacement suppressed tissue replacement by collagen and vimentin. Therefore, the

558 fact that GFR could be measured in tissues, approximately, 60 days after transplantation  
559 would be a great knowledge.

560 There are some limitations to this study. First, we only performed diagnostic  
561 imaging-based assessments and did not assess aspects such as renin and erythropoietin  
562 activities. Second, because we assessed the MNB only for a short period (60 days after  
563 transplantation), we did not perform long-term assessment of function and morphology  
564 of the transplants. These issues need to be elucidated further in future studies.

565 In conclusion, this is the first study to successfully observe the time course of  
566 MNB in detail by ultrasonography. The appropriate timing for urinary tract  
567 reconstruction in rats by SWPU, as revealed by ultrasonography, was when the  
568 metanephros has not undergone hydronephrosis, and the early period from when there  
569 was urinary retention of 0.016 cm<sup>3</sup> in the MNB bladder. This method suppressed the  
570 excessive dilatation of the renal tubules of the transplanted metanephros, thereby  
571 providing evidence to reduce the progression of fibrosis. We believe that this will  
572 greatly contribute to the evaluation of MNB development and urinary tract  
573 reconstruction in xenotransplantation and in human clinical practice. In addition, there  
574 is a possibility that it can be found even when transplanted to another site. It is also  
575 important to evaluate the morphology and function of small grafts in the retroperitoneal

576 cavity while minimizing invasion when considering transplantation into patients in the  
577 future.

578

## 579 **Acknowledgments**

580 No third-party funding or support was received in connection with this study or the  
581 writing or publication of the manuscript. We would like to thank Dr. Satoshi  
582 Kameshima for advice to experiment and Editage ([www.editage.com](http://www.editage.com)) for English  
583 language editing.

584

585

586

## 587 **References**

- 588 1. Hill NR, Fatoba ST, Oke JL, Hirst JA, O'Callaghan CA, Lasserson DS, et al. Global  
589 Prevalence of Chronic Kidney Disease - A Systematic Review and Meta-Analysis.  
590 PLoS One. 2016;11:e0158765.1
- 591 2. Mills KT, Xu Y, Zhang W, Bundy JD, Chen CS, Kelly TN, et al. A systematic  
592 analysis of worldwide population-based data on the global burden of chronic kidney  
593 disease in 2010. *Kidney Int.* 2015;88:950-957.

- 594 3. Takasato M, Er PX, Chiu HS, Maier B, Baillie GJ, Ferguson C, et al. Kidney  
595 Organoids From Human iPS Cells Contain Multiple Lineages and Model Human  
596 Nephrogenesis. *Nature*. 2015;526:564-568
- 597 4. Taguchi A, Kaku Y, Ohmori T, Sharmin S, Ogawa M, Sasaki H, et al. Redefining the  
598 in Vivo Origin of Metanephric Nephron Progenitors Enables Generation of Complex  
599 Kidney Structures from Pluripotent Stem Cells. *Cell Stem Cell*. 2014;14:53-67.
- 600 5. Yokoo T, Ohashi T, Shen JS, Sakurai K, Miyazaki Y, Utsunomiya Y, et al. Human  
601 mesenchymal stem cells in rodent whole-embryo culture are reprogrammed to  
602 contribute to kidney tissues. *Proc Natl Acad Sci U S A*. 2005;102:3296-3300.
- 603 6. Matsumoto K, Yokoo T, Matsunari H, Iwai S, Yokote S, Teratani T, et al.  
604 Xenotransplanted embryonic kidney provides a niche for endogenous mesenchymal  
605 stem cell differentiation into erythropoietin-producing tissue. *Stem Cells*.  
606 2012;30:1228-1235.
- 607 7. Yokoo T, Fukui A, Ohashi T, Miyazaki Y, Utsunomiya Y, Kawamura T, et al.  
608 Xenobiotic Kidney Organogenesis from Human Mesenchymal Stem Cells Using a  
609 Growing Rodent Embryo. *J Am Soc Nephrol*. 2006;17:1026-1034.

- 610 8. Yamanaka S, Tajiri S, Fujimoto T, Matsumoto K, Fukunaga S, Kim BS, et al.  
611 Generation of interspecies limited chimeric nephrons using a conditional nephron  
612 progenitor cell replacement system. *Nat Commun.* 2017;8:1719.
- 613 9. Fujimoto T, Yamanaka S, Tajiri S, Takamura T, Saito Y, Matsumoto K, et al. In vivo  
614 regeneration of interspecies chimeric kidneys using a nephron progenitor cell  
615 replacement system. *Sci Rep.* 2019;9:6965.
- 616 10. Tajiri S, Yamanaka S, Fujimoto T, Matsumoto K, Taguchi A, Nishinakamura R, et  
617 al. Regenerative potential of induced pluripotent stem cells derived from patients  
618 undergoing haemodialysis in kidney regeneration. *Sci Rep.* 2018;8:14919.
- 619 11. Yokote S, Matsunari H, Iwai S, Yamanaka S, Uchikura A, Fujimoto E, et al. Urine  
620 excretion strategy for stem cell-generated embryonic kidneys. *Proc Natl Acad Sci U S*  
621 *A.* 2015;112:12980-12985.
- 622 12. Fujimoto E, Yamanaka S, Kurihara S, Tajiri S, Izuhara L, Katsuoka Y, et al.  
623 Embryonic kidney function in chronic renal failure model in rodents. *Clin Exp Nephrol.*  
624 2017;21:579-588.
- 625 13. Yokoo T, Fukui A, Matsumoto K, Kawamura T. Kidney regeneration by xeno-  
626 embryonic nephrogenesis. *Med Mol Morphol.* 2008;41:5-13.

- 627 14. Chevalier RL, Kim A, Thornhill BA, Wolstenholme JT. Recovery following relief  
628 of unilateral ureteral obstruction in the neonatal rat. *Kidney Int.* 1999;55:793-807.
- 629 15. Chevalier RL, Thornhill BA, Chang AY, Cachat F, Lackey A. Recovery from  
630 release of ureteral obstruction in the rat: relationship to nephrogenesis. *Kidney Int.*  
631 2002;61:2033-2043.
- 632 16. Truong LD, Gaber L, Eknoyan G. Obstructive uropathy. *Contrib Nephrol.*  
633 2011;169:311-326.
- 634 17. Ichikawa I, Kuwayama F, Pope JC 4th, Stephens FD, Miyazaki Y. Paradigm shift  
635 from classic anatomic theories to contemporary cell biological views of CAKUT.  
636 *Kidney Int.* 2002;61:889-898.
- 637 18. Kanda Y. Investigation of the freely available easy-to-use software 'EZR' for  
638 medical statistics. *Bone Marrow Transplant.* 2013;48:452-458.
- 639 19. Marshall D, Clancy M, Bottomley M, Symonds K, Brenchley PE, Bravery CA.  
640 Transplantation of metanephroi to sites within the abdominal cavity. *Transplant Proc.*  
641 2005;37:194-197.
- 642 20. Vera-Donoso CD, García-Dominguez X, Jiménez-Trigos E, García-Valero L,  
643 Vicente JS, Marco-Jiménez F. Laparoscopic transplantation of metanephroi: A first step  
644 to kidney xenotransplantation. *Actas Urol Esp.* 2015;39:527-534.

- 645 21. Rogers SA, Lowell JA, Hammerman NA, Hammerman MR. Transplantation of  
646 developing metanephros into adult rats. *Kidney Int.* 1998;54:27-37.
- 647 22. Marshall D, Clancy M, Bottomley M, Symonds K, Brenchley PE, Bravery CA.  
648 Transplantation of metanephros to sites within the abdominal cavity. *Transplant Proc.*  
649 2005;37:194-197.
- 650 23. Nagai E, Ishigaki N, Hakusui H. Pharmacokinetic Studies of Iohexol after a Single  
651 Intravenous Injection in Rats. *Prog Med.* 1986;6:2378-2389.
- 652 24. Clancy MJ, Marshall D, Dilworth M, Bottomley M, Ashton N, Brenchley P.  
653 Immunosuppression is essential for successful allogeneic transplantation of the  
654 metanephros. *Transplantation.* 2009;88:151-159.
- 655 25. Isaksen CV, Eik-Nes SH, Blaas HG, Torp SH. Fetuses and infants with congenital  
656 urinary system anomalies: correlation between prenatal ultrasound and postmortem  
657 findings. *Ultrasound Obstet Gynecol.* 2000;15:177-185.
- 658 26. Fernbach SK, Maizels M, Conway JJ. Ultrasound grading of hydronephrosis:  
659 introduction to the system used by the Society for Fetal Urology. *Pediatr Radiol.*  
660 1993;23:478-480.

- 661 27. Hyun CK, Dal MY, Sang HL, Yong DC. Usefulness of Renal Volume  
662 Measurements Obtained by a 3-Dimensional Sonographic Transducer with Matrix  
663 Electronic Arrays. *J Ultrasound Med.* 2008;27:1673-1681.
- 664 28. Marcello M, Pier P, Antonio S, Raffaele L, Ernesto S, Massimo S, et al. Accuracy  
665 of Sonographic Volume Measurements of Kidney Transplant. *J Clin Ultrasound.*  
666 2006;34:184-189.
- 667 29. Noto H, Kizu N, Sugaya K, Nishizawa O, Harada T, Tsuchida T. Prostate  
668 measurement by transabdominal ultrasonography. *Journal of the Japanese Urology.*  
669 1987;78:1071-1076.
- 670 30. Reid T, Stacy AL, Stephen RW, Gregory BD. Estimation of feline renal volume  
671 using computed tomography and ultrasound. *Vet Radiol Ultrasound.* 2012;54:127-132.
- 672 31. Barberet V, Baeumlin Y, Taeymans O, Duchateau L, Peremans K, van Hoek I,  
673 Daminet S, Saunders JH. Pre- and posttreatment ultrasonography of the thyroid gland in  
674 hyperthyroid cats. *Vet Radiol Ultrasound.* 2010;51:324-330.
- 675 32. Yokoo T, Fukui A, Matsumoto K, Ohashi T, Sado Y, Suzuki H, et al. Generation of  
676 a transplantable erythropoietin-producer derived from human mesenchymal stem cells.  
677 *Transplantation.* 2008;85:1654-1658.



- 678 33. Distler JH, Hirth A, Kurowska-Stolarska M, Gay RE, Gay S, Distler O. Angiogenic  
679 and angiostatic factors in the molecular control of angiogenesis. *Q J Nucl Med.*  
680 2003;47:149-161.
- 681 34. Tufro A. VEGF spatially directs angiogenesis during metanephric development in  
682 vitro. *Dev Biol.* 2000;227:558-566.
- 683 35. Chaudhary NI, Roth GJ, Hilberg F, Müller-Quernheim J, Prasse A, Zissel G, et al.  
684 Inhibition of PDGF, VEGF and FGF signalling attenuates fibrosis. *Eur Respir J.*  
685 2007;29:976-985.
- 686 36. Kariya T, Nishimura H, Mizuno M, Suzuki Y, Matsukawa Y, Sakata F, et al. TGF-  
687  $\beta$ 1-VEGF-A pathway induces neoangiogenesis with peritoneal fibrosis in patients  
688 undergoing peritoneal dialysis. *Am J Physiol Renal Physiol.* 2018;314:F167-180.
- 689 37. Lin SL, Chang FC, Schrimpf C, Chen YT, Wu CF, Wu VC, et al. Targeting  
690 endothelium-pericyte cross talk by inhibiting VEGF receptor signaling attenuates  
691 kidney microvascular rarefaction and fibrosis. *Am J Pathol.* 2011;178:911-923.
- 692 38. Peters CA, Gaertner RC, Carr MC, Mandell J. Fetal compensatory renal growth due  
693 to unilateral ureteral obstruction. *J Urol.* 1993;150:597-600.
- 694 39. Moeller BJ, Cao Y, Vujaskovic Z, Li CY, Haroon ZA, Dewhirst MW. The  
695 relationship between hypoxia and angiogenesis. *Semin Radiat Oncol.* 2004;14:215-221.

- 696 40. Meng XM, Nikolic-Paterson DJ, Lan HY. TGF- $\beta$ : the master regulator of fibrosis.  
697 Nat Rev Nephrol. 2016;12:325-338.
- 698 41. Akhurst RJ, Lehnert SA, Faissner A, Duffie E. TGF beta in murine morphogenetic  
699 processes: the early embryo and cardiogenesis. Development. 1990;108:645-656.
- 700 42. Gatherer D, Ten Dijke P, Baird DT, Akhurst RJ. Expression of TGF-beta isoforms  
701 during first trimester human embryogenesis. Development. 1990;110:445-460.
- 702 43. Dockrell ME, Phanish MK, Hendry BM. Tgf-beta auto-induction and connective  
703 tissue growth factor expression in human renal tubule epithelial cells requires N-ras.  
704 Nephron Exp Nephrol. 2009;112:e71-79.
- 705 44. Higgins SP, Tang Y, Higgins CE, Mian B, Zhang W, Czekay RP, et al. TGF- $\beta$ 1/p53  
706 signaling in renal fibrogenesis. Cell Signal. 2018;43:1-10.
- 707 45. Schuster N, Krieglstein K. Mechanisms of TGF-beta-mediated apoptosis. Cell  
708 Tissue Res. 2002;307:1-14.

709

## 710 **Supporting information**

711 S1 Fig. Stepwise peristaltic ureter (SWPU) system

712 The recipient is transplanted with the MNB and allowed to grow. The ureter of the  
713 recipient is anastomosed to the MNB bladder where urine has accumulated. In this  
714 manner, MNB can measure urinary excretion.

715

716 **S2 Fig. Experimental procedure**

717 A) Experiment 1, B) Experiment 2, C) Experiment 3

718

719 **S Table. GFR measurements in healthy adult rats using inulin clearance**

720 Measurements are performed in the same situation as the GFR measurement method in  
721 the MNB.

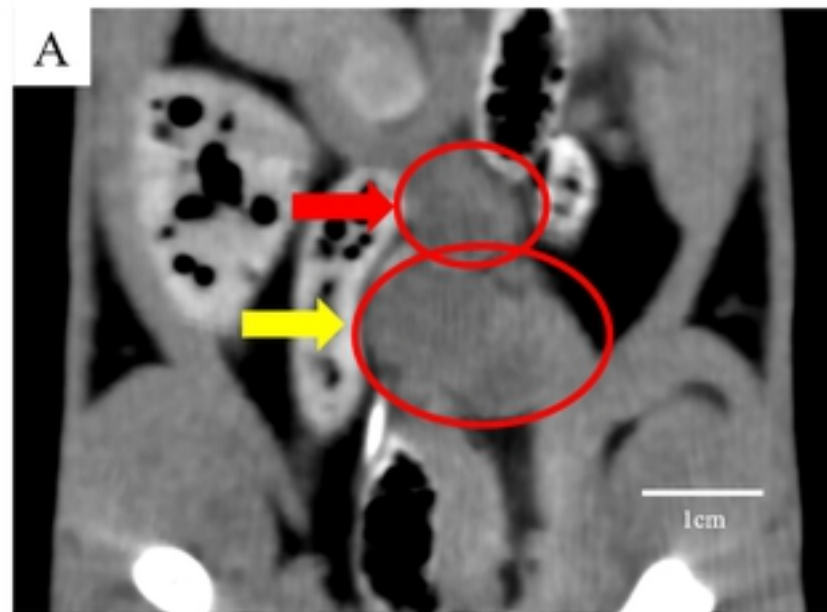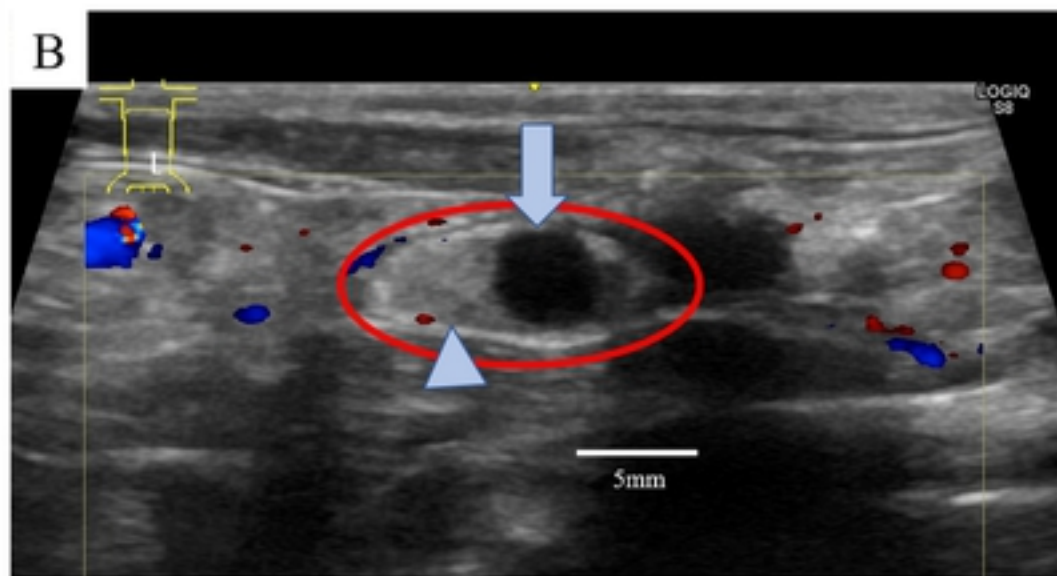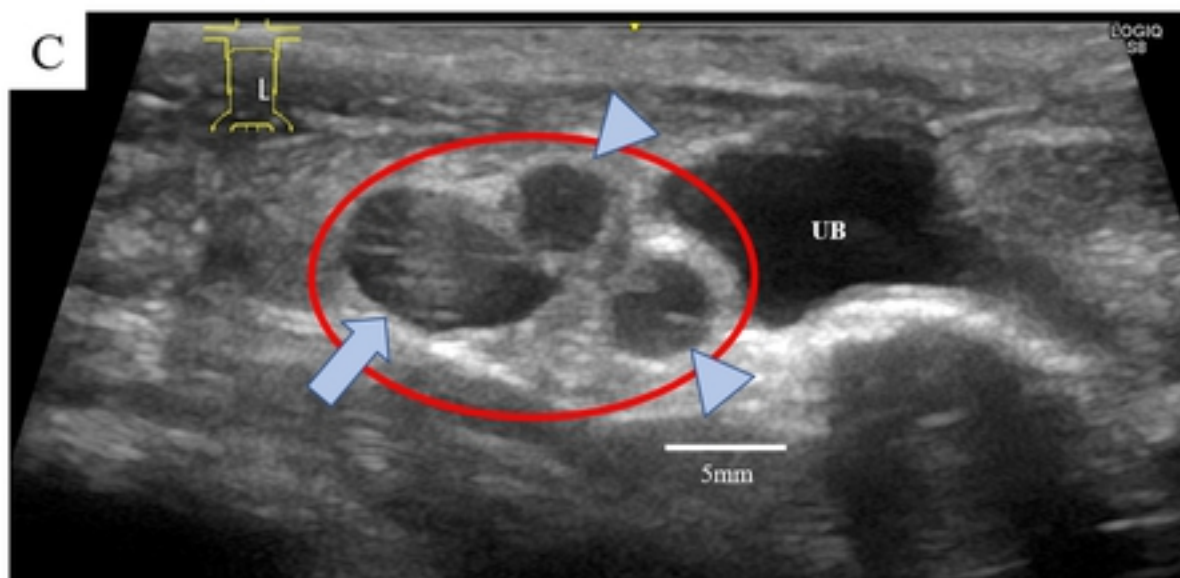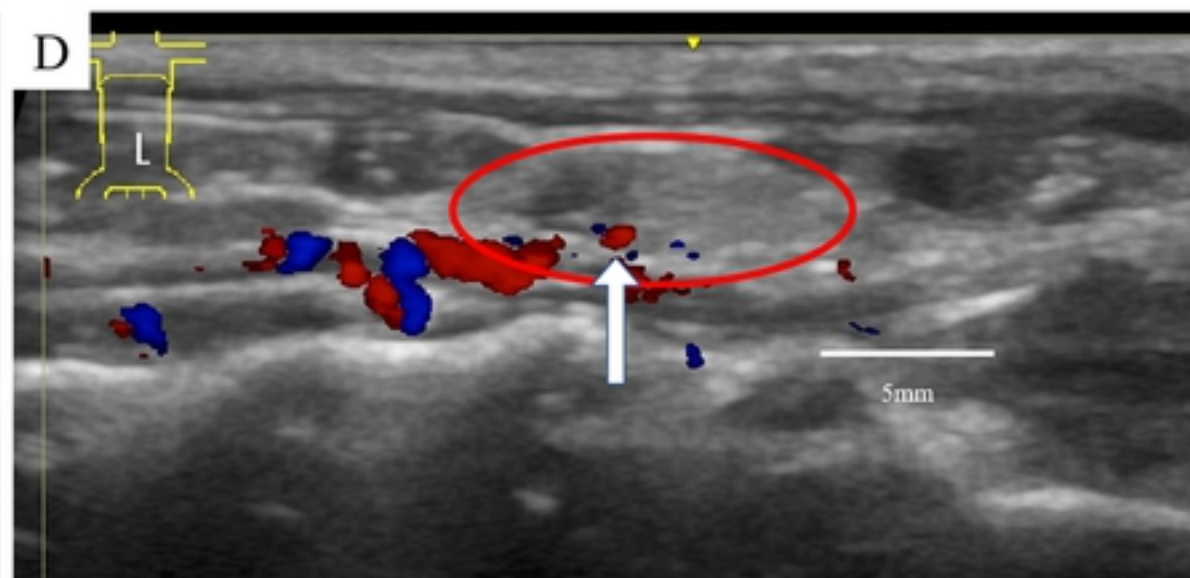

Fig1.

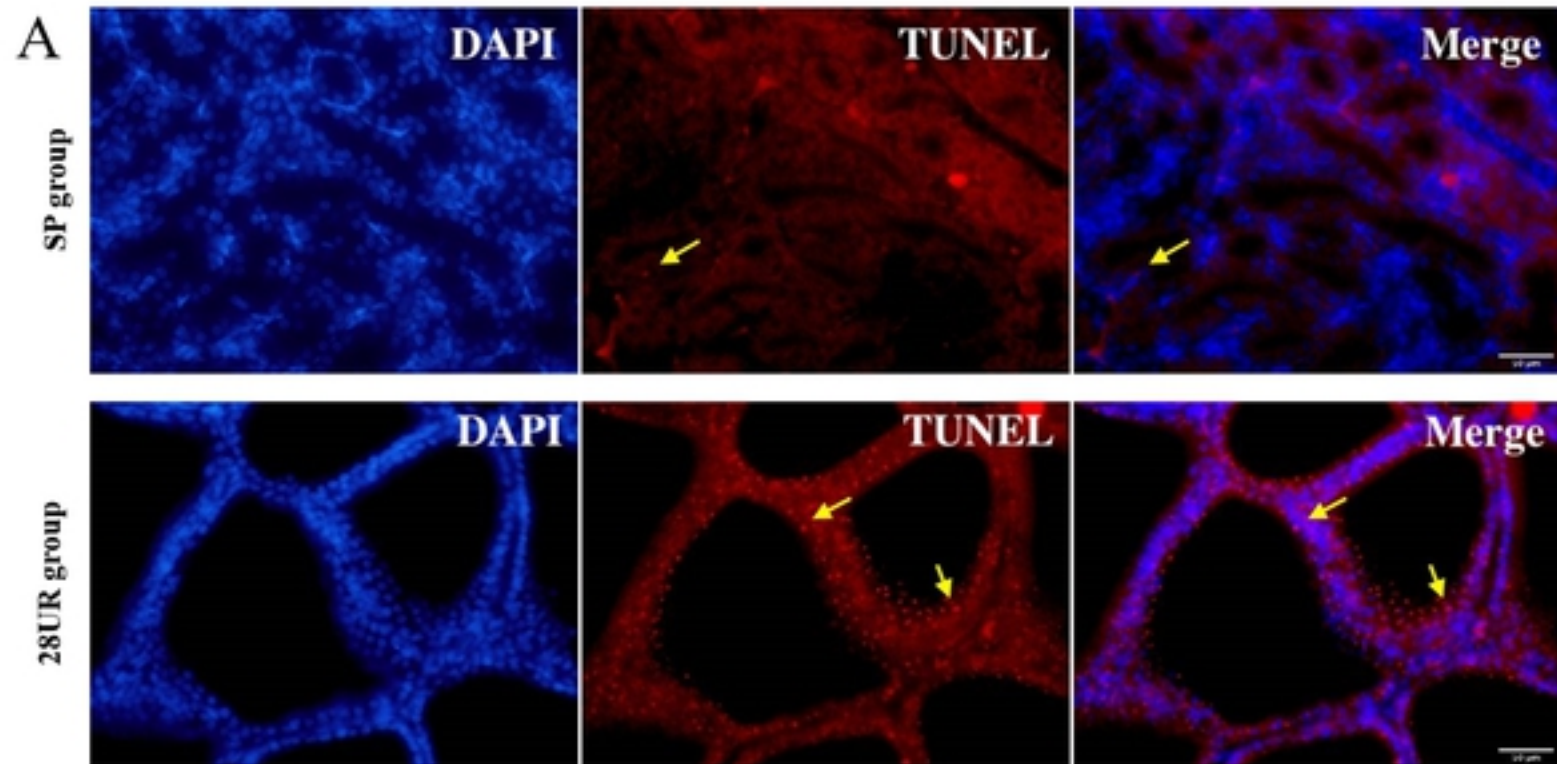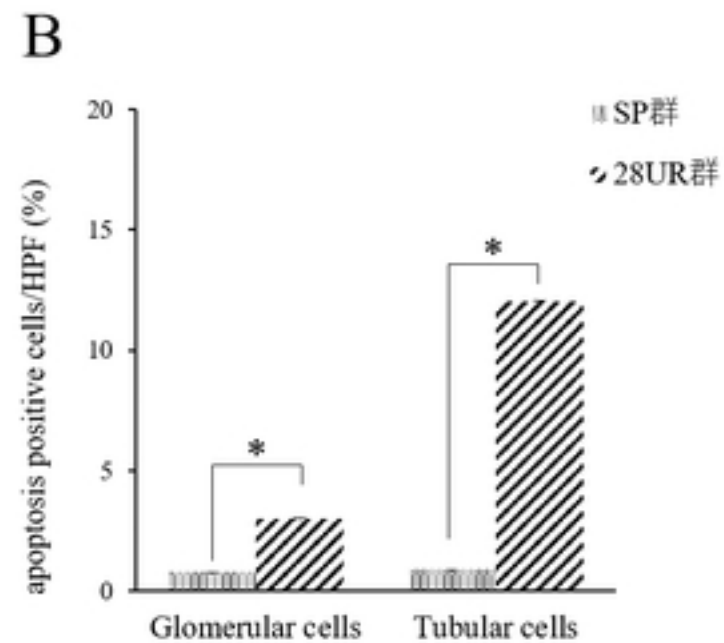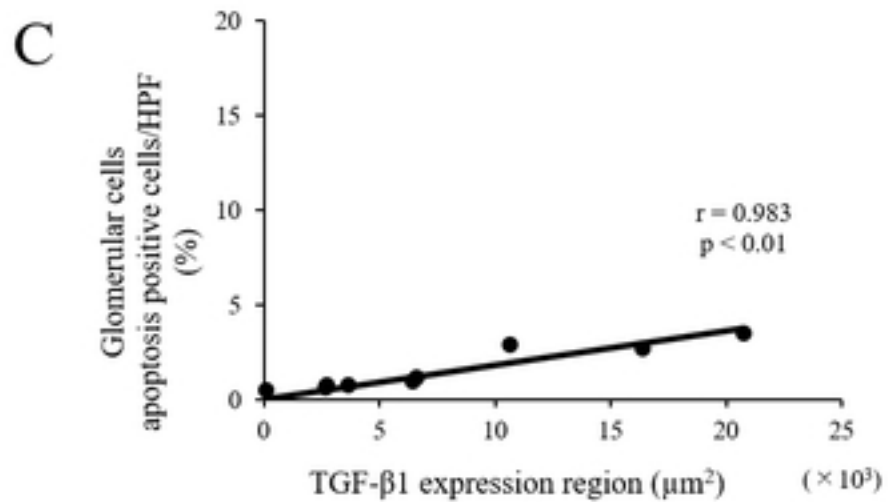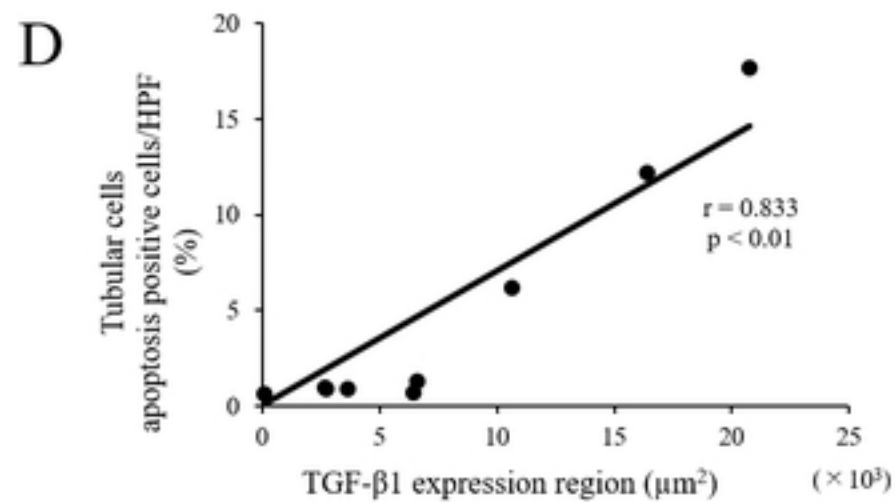

Fig10.

|                   | MNB volume in each week by imaging devices (cm <sup>3</sup> ) |        |                 |                    |                  |                    |                  |                    |                    |                   |                  |
|-------------------|---------------------------------------------------------------|--------|-----------------|--------------------|------------------|--------------------|------------------|--------------------|--------------------|-------------------|------------------|
|                   |                                                               | week 1 | week 2          | week 3             | week 4           | week 5             | week 6           | week 6.5           | week 7             | week 7.5          | week 8           |
| <b>CT</b>         | MNB 1                                                         | —      | —               | —                  | —                | —                  | —                | 0.310 ±<br>0.141*  | —                  | 0.352 ±<br>0.195* | —                |
|                   | MNB 2                                                         | —      | —               | —                  | —                | —                  | —                | 0.096±<br>0.053    | —                  | 0.203±<br>0.107   | —                |
| <b>Ultrasound</b> | MNB 1                                                         | ND     | 0.073±<br>0.041 | 0.139 ±<br>0.090 † | 0.277 ±<br>0.131 | 0.271 ±<br>0.082 † | 0.396 ±<br>0.136 | 0.390 ±<br>0.148   | 0.361 ±<br>0.146   | 0.452 ±<br>0.164  | 0.381 ±<br>0.252 |
|                   | MNB 2                                                         | —      | —               | —                  | —                | 0.019 ±<br>0.010   | 0.098 ±<br>0.090 | 0.096 ±<br>0.039 † | 0.145 ±<br>0.082 † | 0.203 ±<br>0.120  | 0.214 ±<br>0.164 |

Fig2.

A

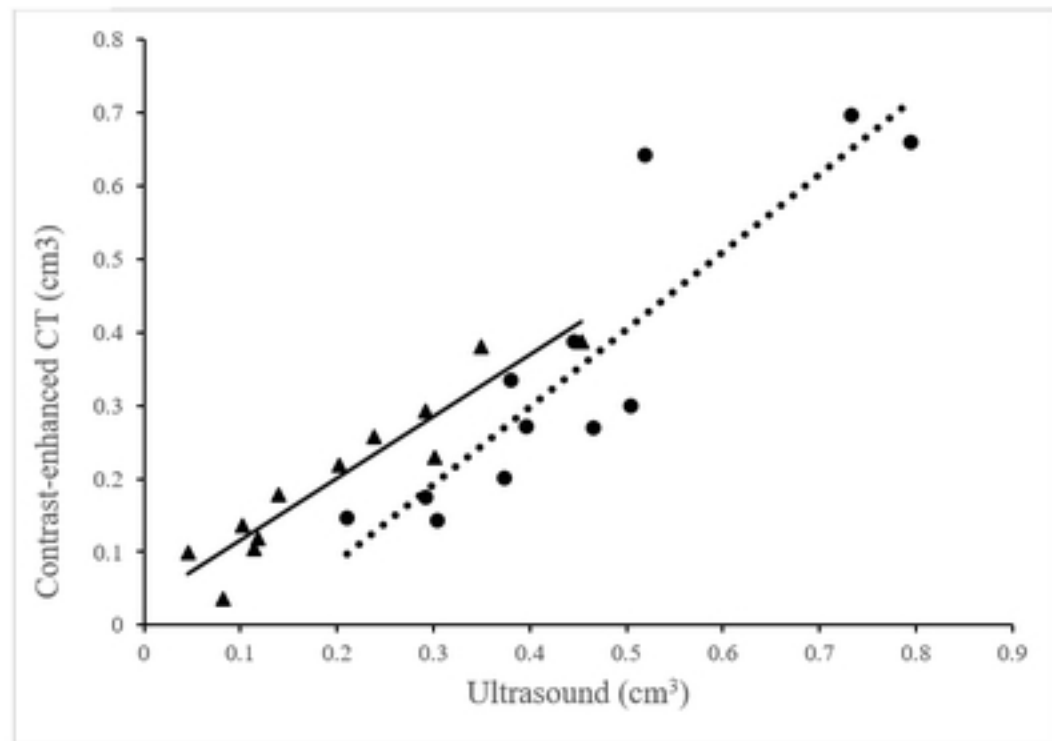

B

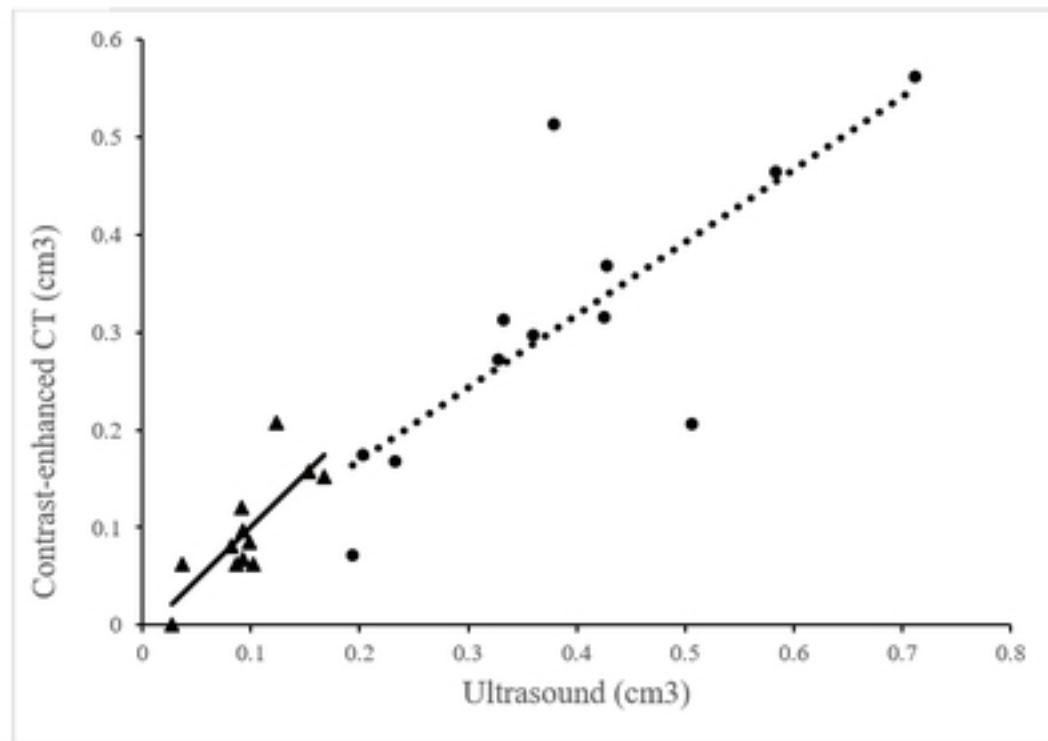

Fig3.



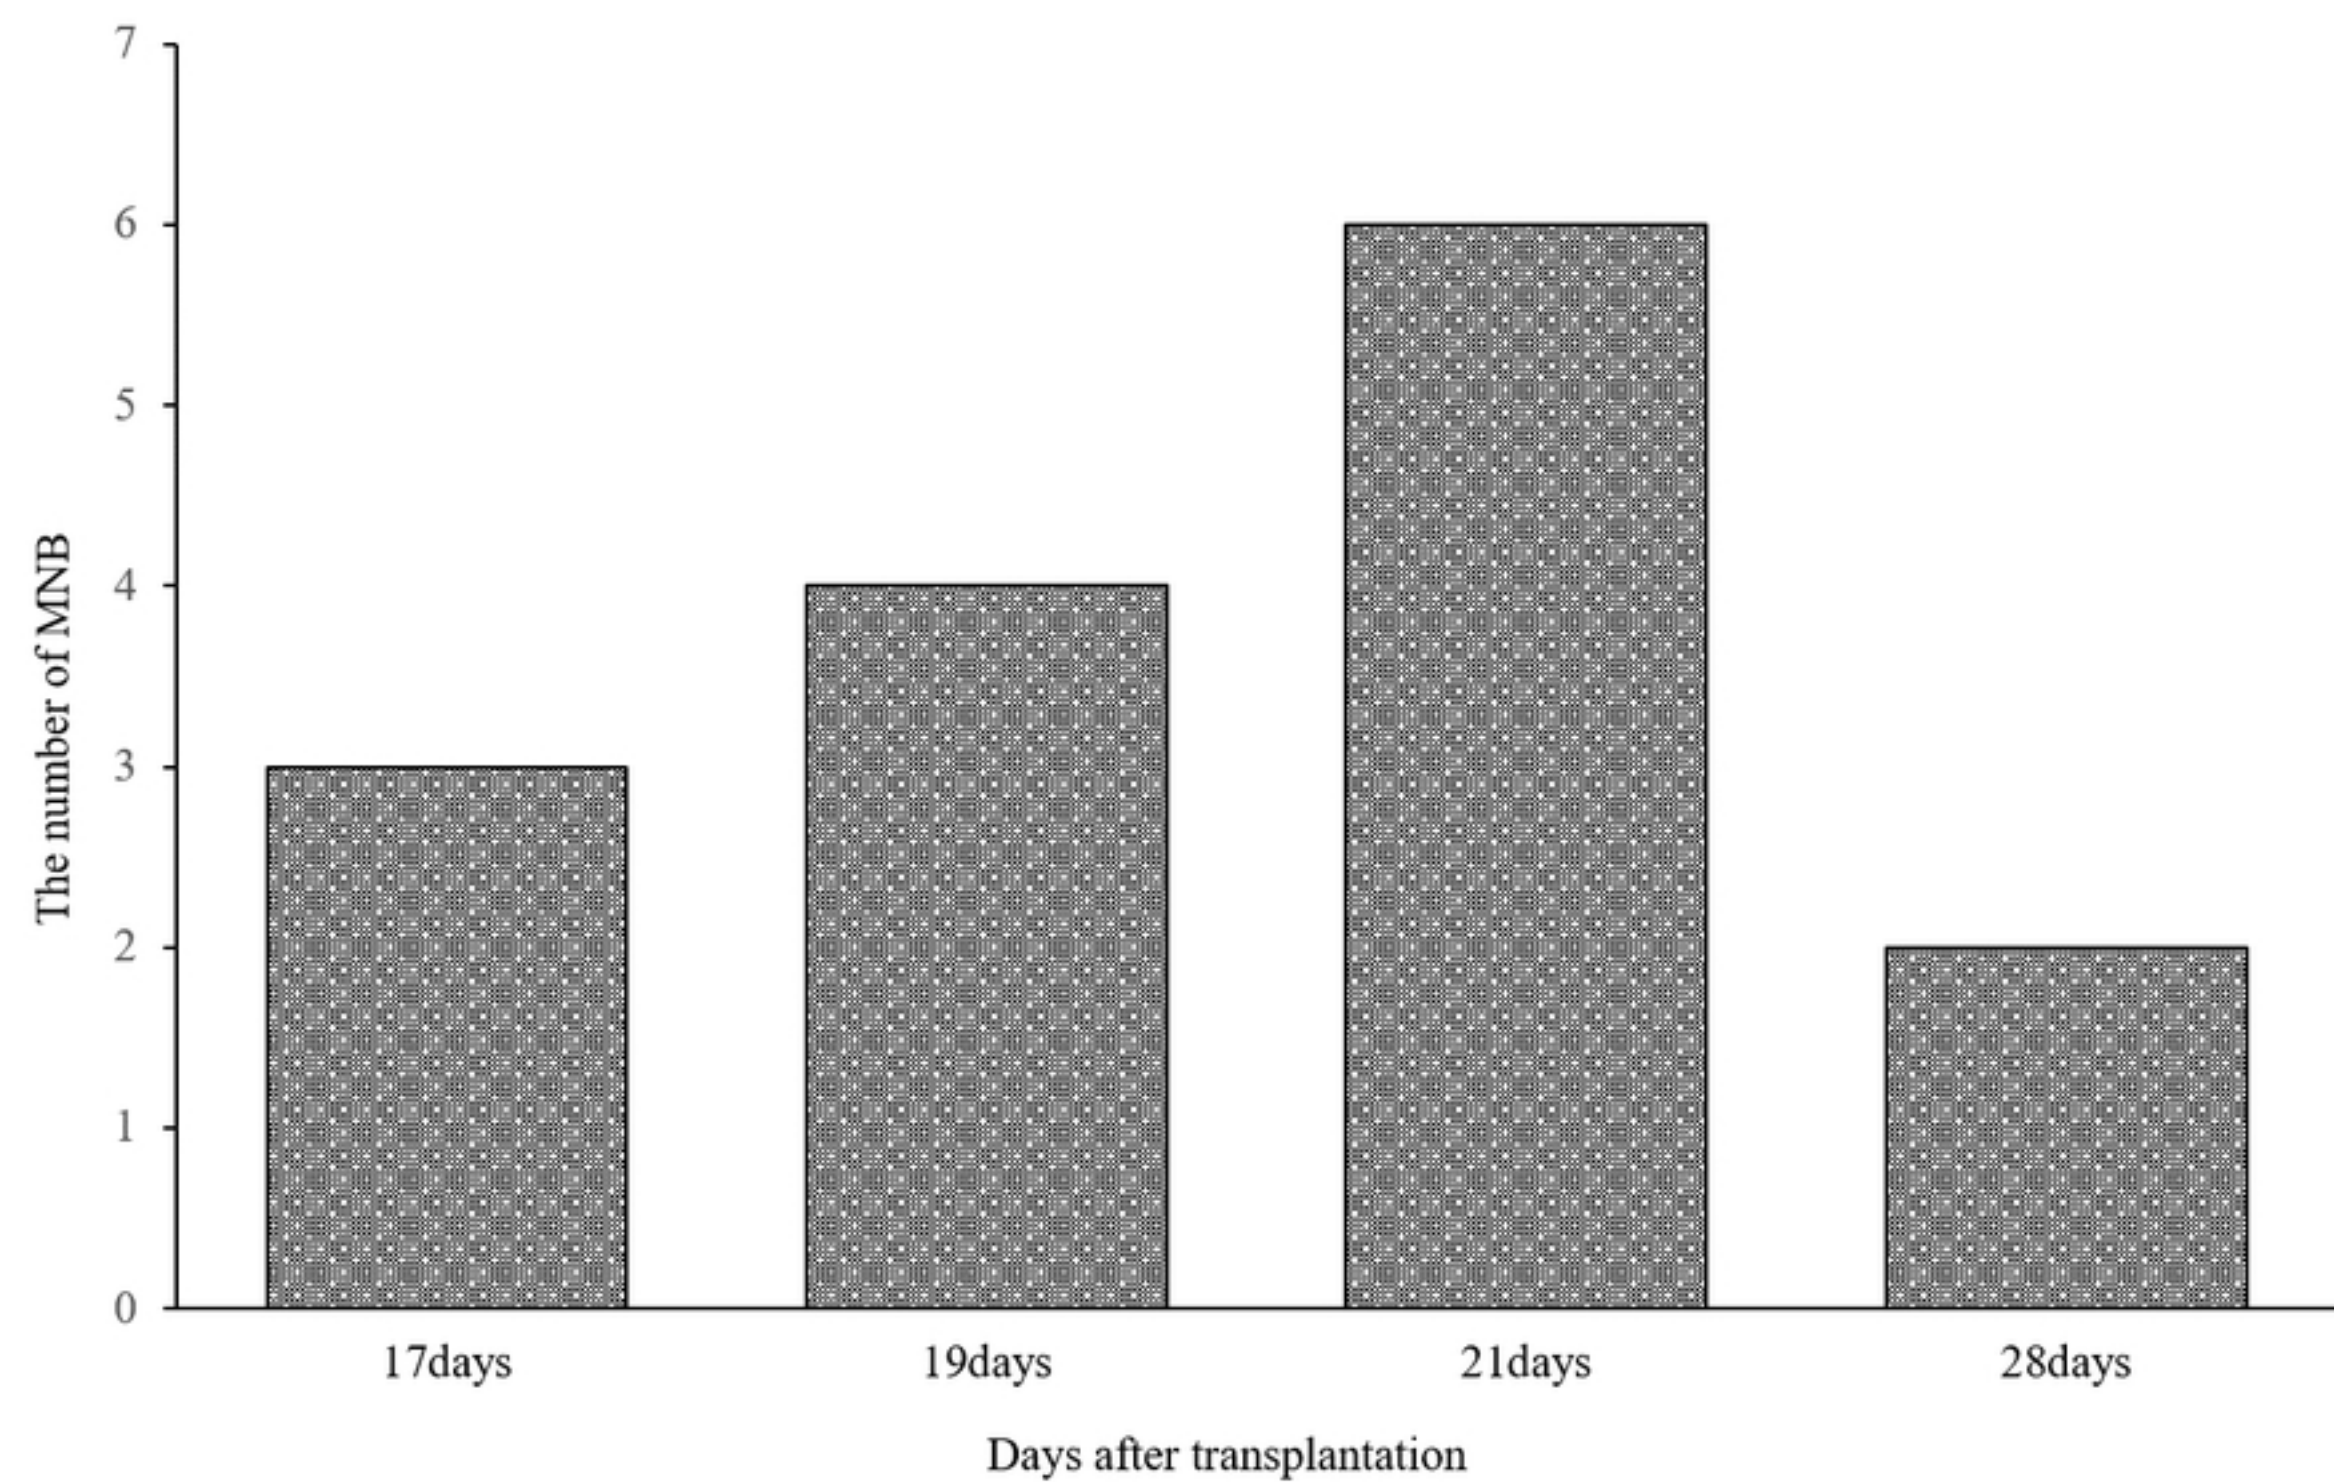

Fig4.



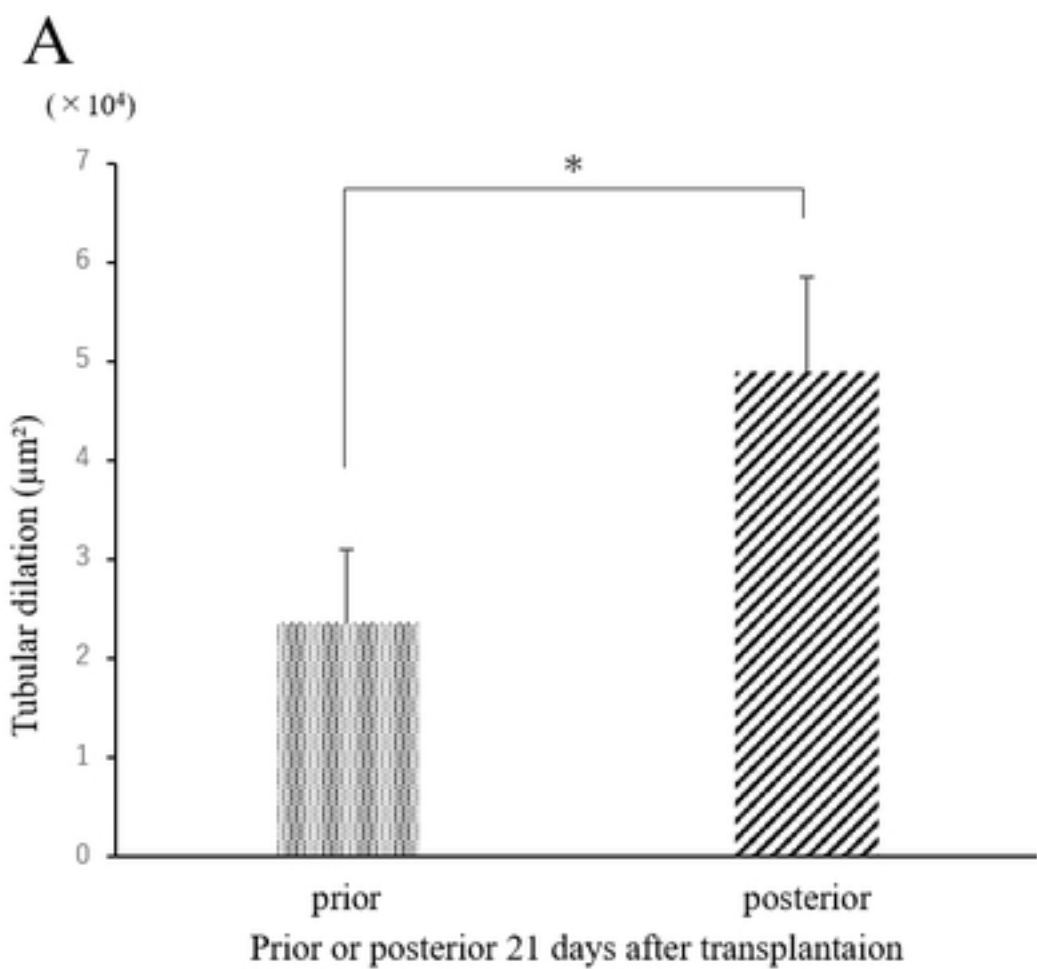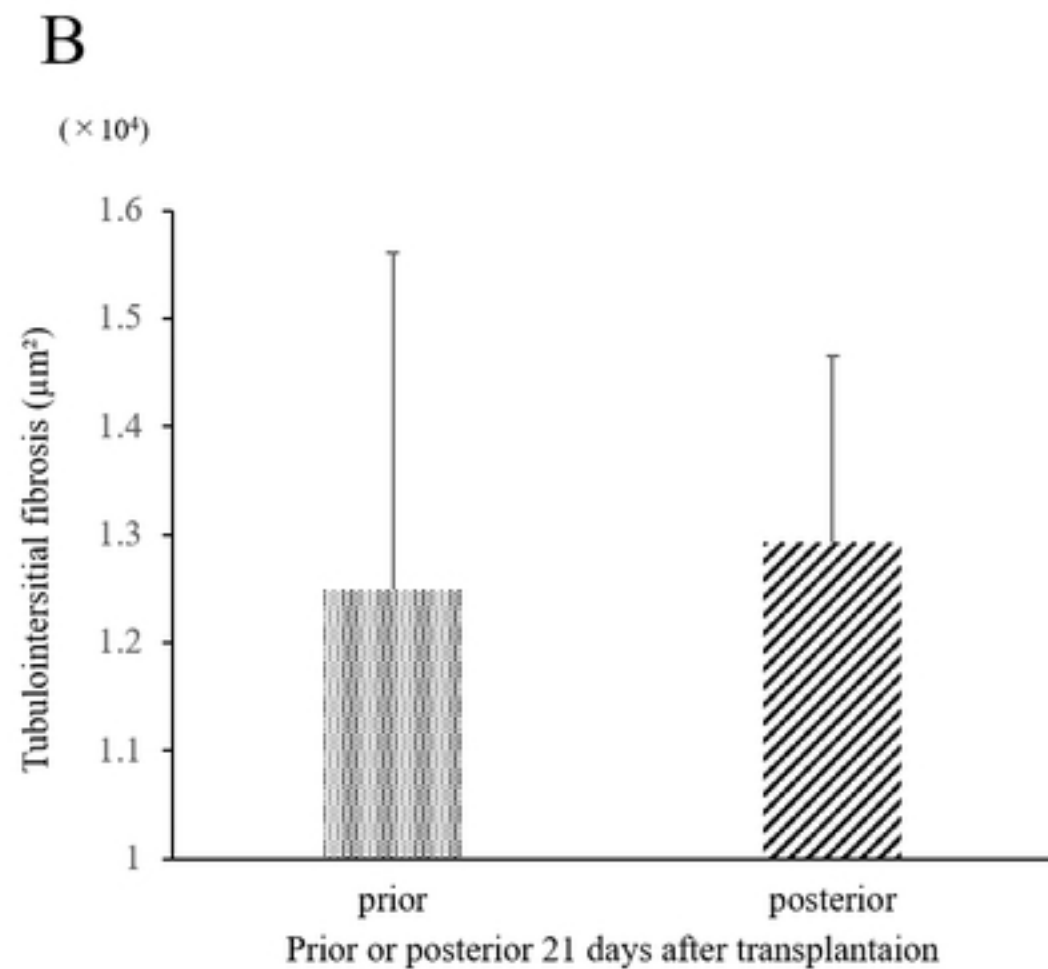

Fig5.

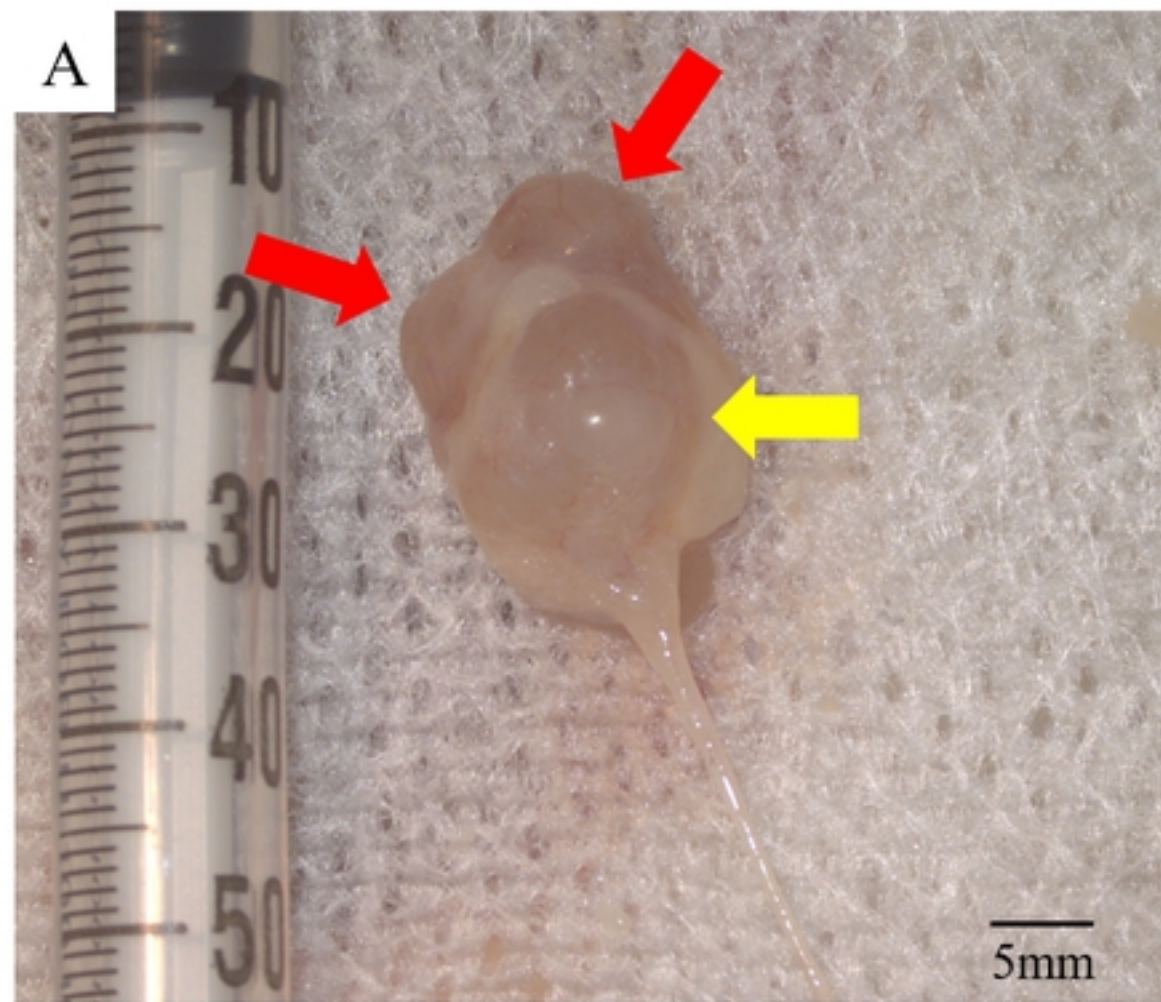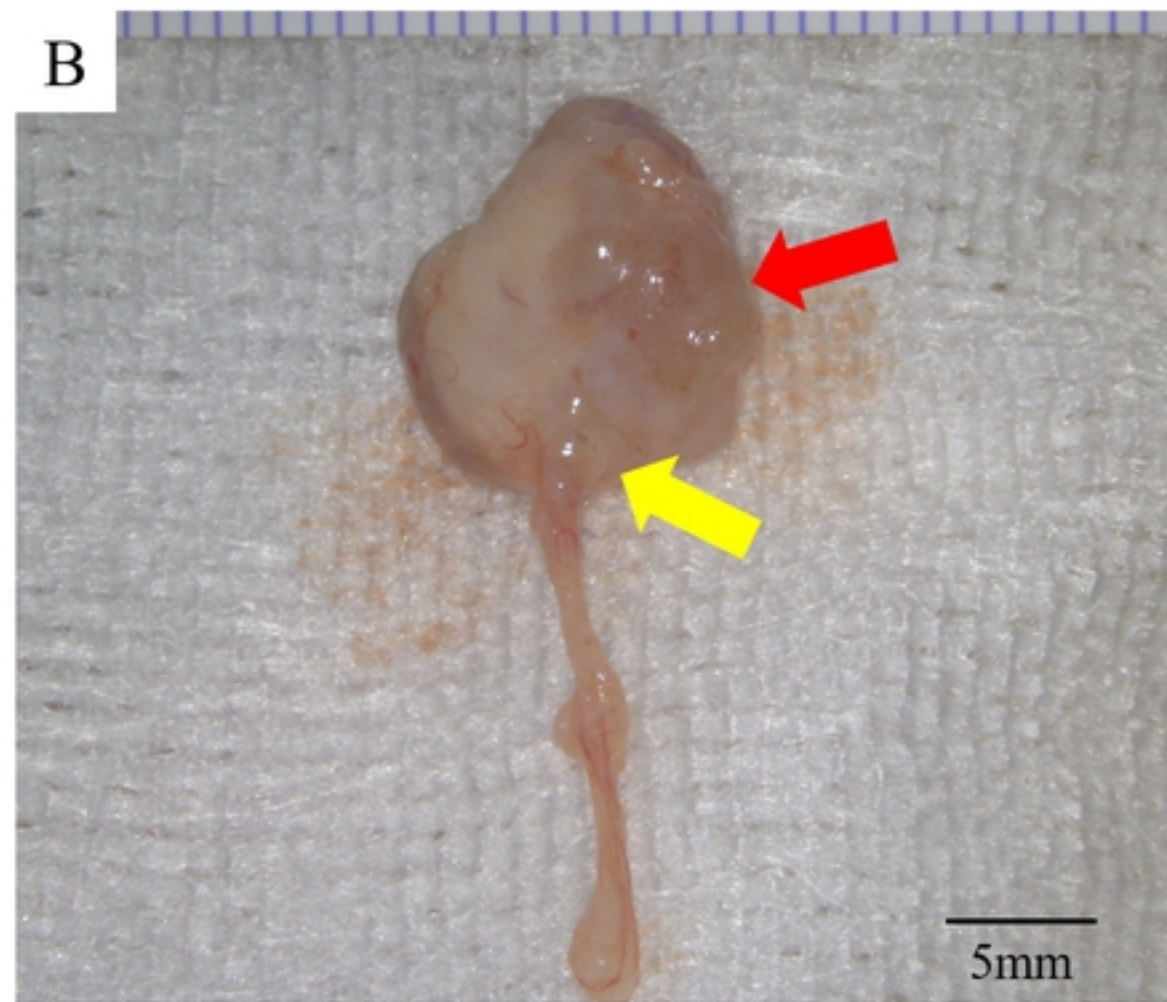

Fig6.



**A**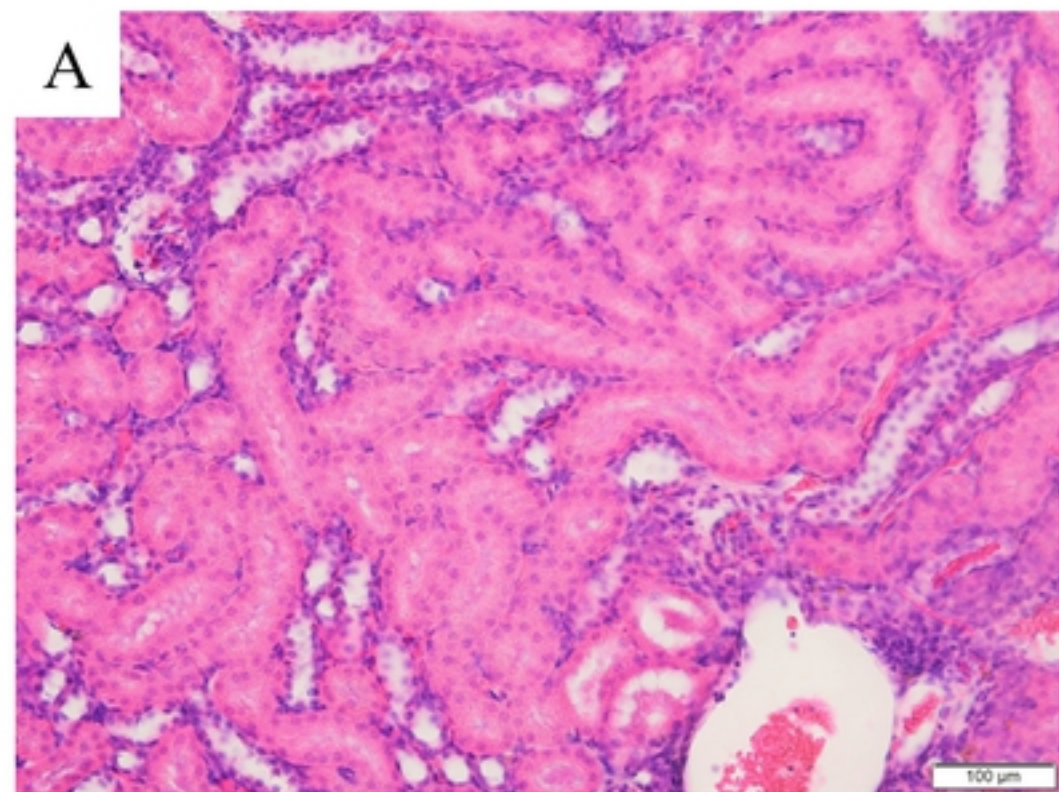**B**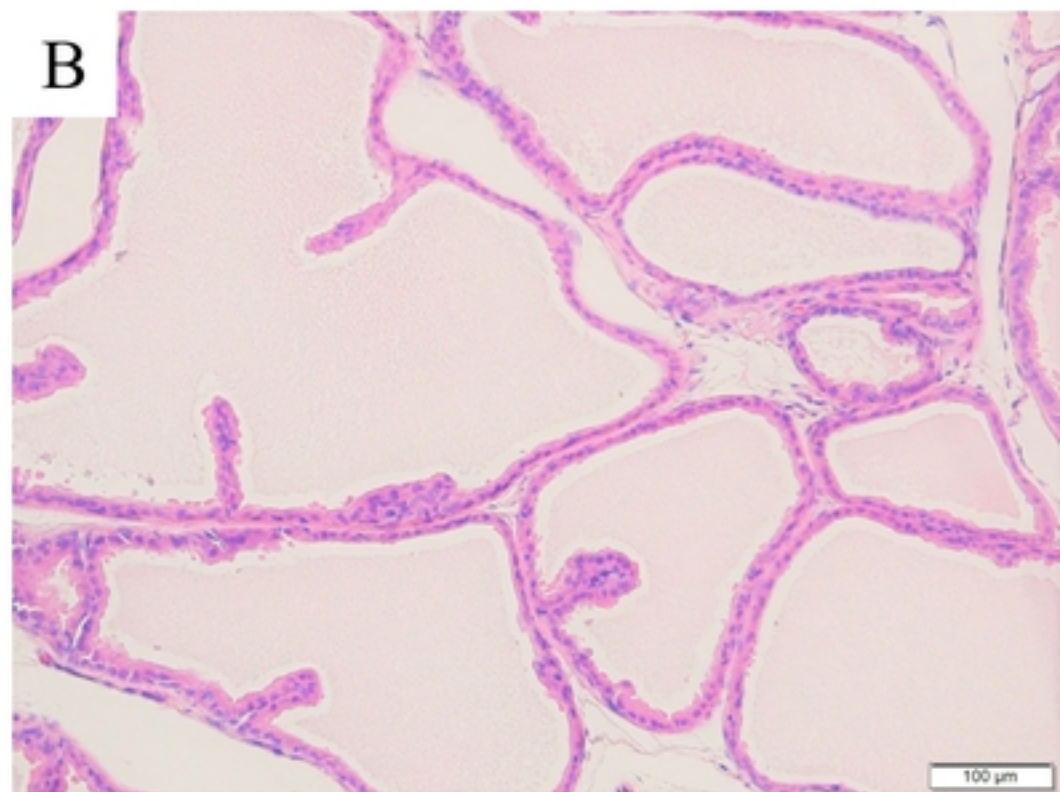**C**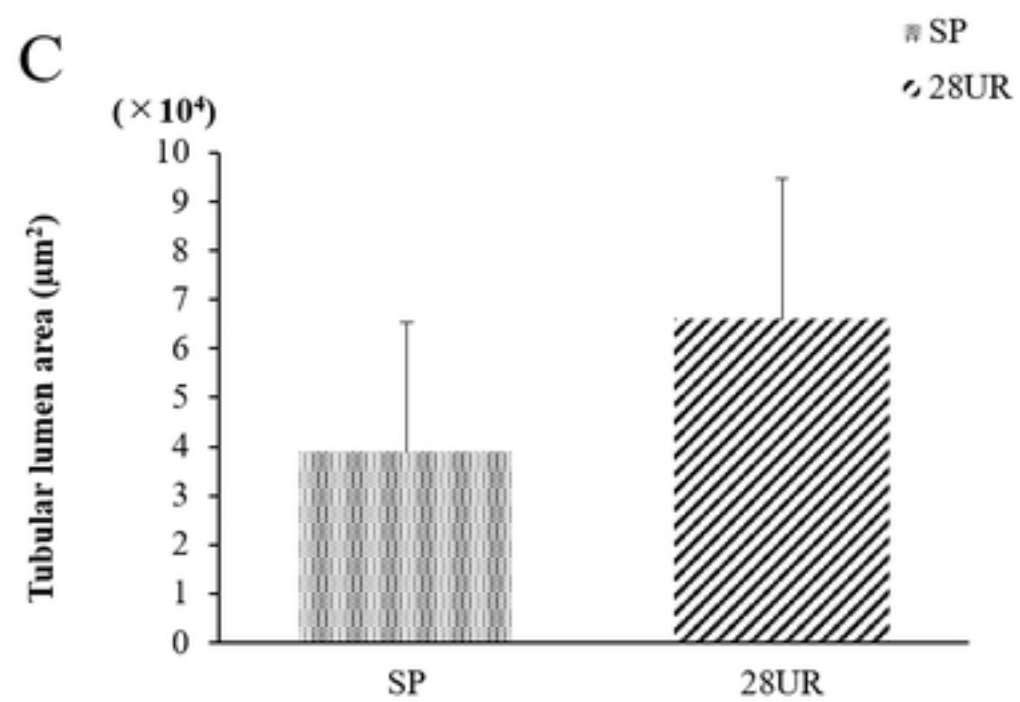**Fig7.**



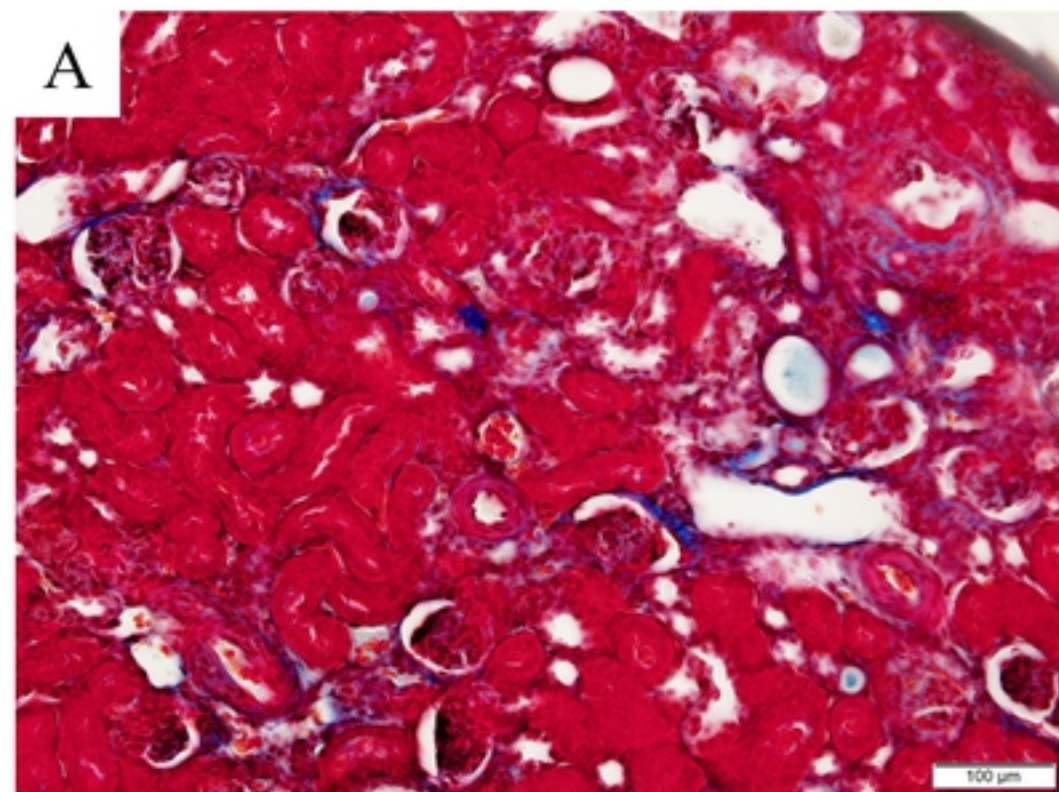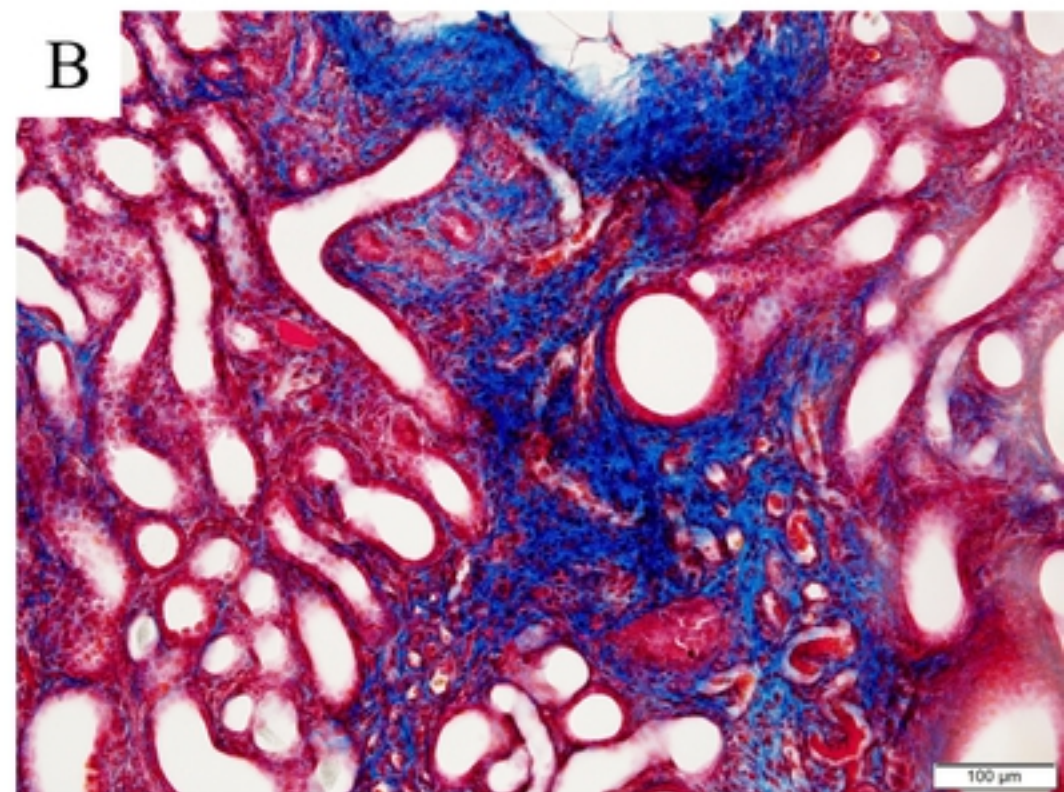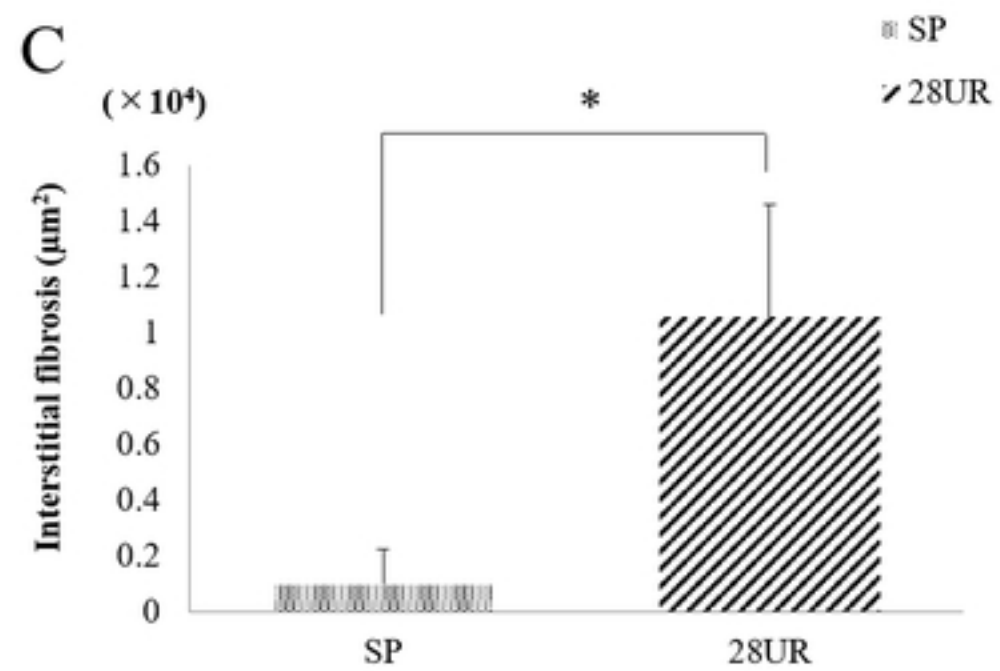

Fig8.



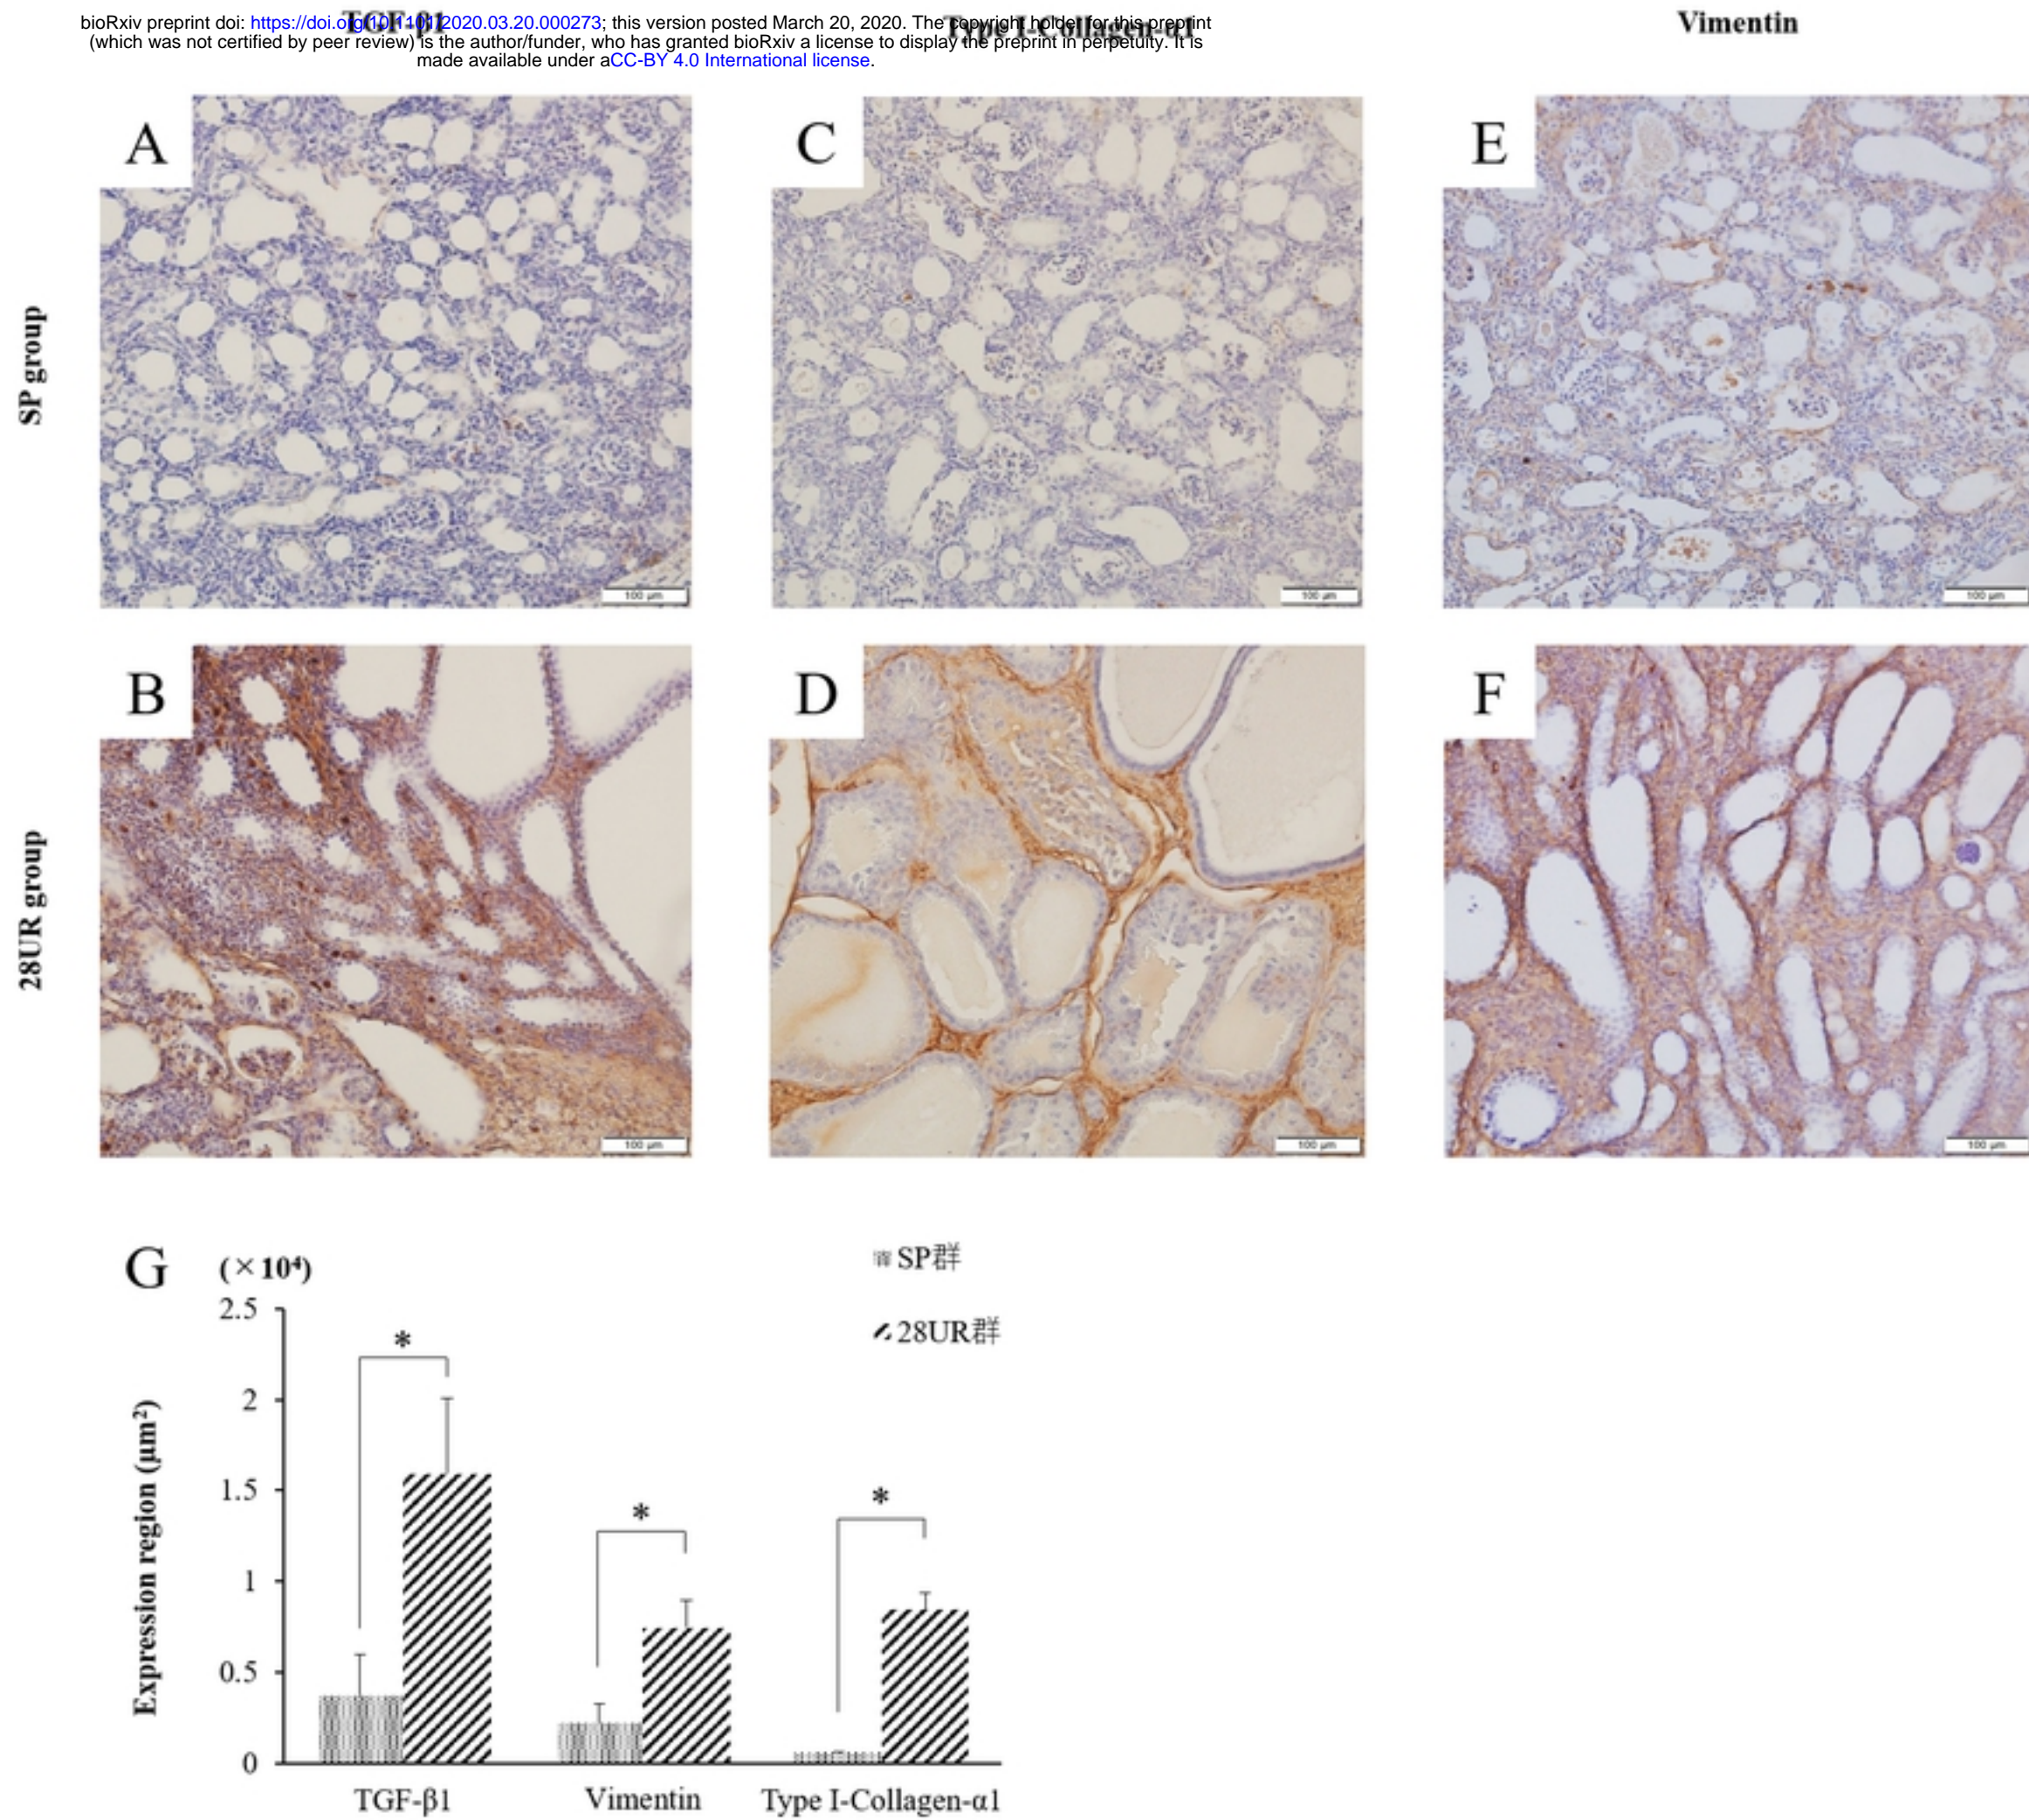

Fig9.
